# Supplementary material for: Isaria fumosorosea KCh J2 Entomopathogenic Strain as an Effective Biocatalyst for Steroid Compound Transformations
Source: PubMed Central journal article supplement (PMC6151793; doi:10.3390/molecules22091511), 2017-09-09

## Supplementary Data

### ***Isaria fumosorosea* KCh J2 - entomopathogenic strain as an effective biocatalyst of steroid compounds**

Ewa Kozłowska,\* Monika Dymarska, Edyta Kostrzewa-Susłow, and Tomasz Janeczko\*

Department of Chemistry, Wrocław University of Environmental and Life Sciences, Norwida 25, 50-375 Wrocław, Poland.

\*Corresponding author: E-mail: e.a.kozłowska@gmail.com (Ewa Kozłowska); janeczko13@interia.pl (Tomasz Janeczko)

#### **Content**

Fig.S1. <sup>1</sup>H NMR spectral of 7 $\alpha$ -hydroxyandrost-4-ene-3,17-dione (**7 $\alpha$ -OH-AD**) (CDCl<sub>3</sub>, 600 MHz)

Fig.S2. <sup>13</sup>C NMR spectral of 7 $\alpha$ -hydroxyandrost-4-ene-3,17-dione (**7 $\alpha$ -OH-AD**) (CDCl<sub>3</sub>, 151 MHz)

Fig.S3. HSQC spectral of 7 $\alpha$ -hydroxyandrost-4-ene-3,17-dione (**7 $\alpha$ -OH-AD**) (CDCl<sub>3</sub>, 151 MHz)

Fig.S4. COSY spectral of 7 $\alpha$ -hydroxyandrost-4-ene-3,17-dione (**7 $\alpha$ -OH-AD**) (CDCl<sub>3</sub>, 151 MHz)

Fig.S5. <sup>1</sup>H NMR spectral of 6 $\beta$ -hydroxyandrost-4-ene-3,11,17-trione (**6 $\beta$ -OH-Adr**) (CDCl<sub>3</sub>, 600 MHz)

Fig.S6. <sup>13</sup>C NMR spectral of 6 $\beta$ -hydroxyandrost-4-ene-3,11,17-trione (**6 $\beta$ -OH-Adr**) (CDCl<sub>3</sub>, 151 MHz)

Fig.S7. HSQC spectral of 6 $\beta$ -hydroxyandrost-4-ene-3,11,17-trione (**6 $\beta$ -OH-Adr**) (CDCl<sub>3</sub>, 151 MHz)

Fig.S8. COSY spectral of 6 $\beta$ -hydroxyandrost-4-ene-3,11,17-trione (**6 $\beta$ -OH-Adr**) (CDCl<sub>3</sub>, 151 MHz)

Fig.S9. <sup>1</sup>H NMR spectral of 15 $\beta$ -hydroxy-17 $\alpha$ -methyltestosterone (**15 $\beta$ -OH-mT**) (CDCl<sub>3</sub>, 600 MHz)

Fig.S10. <sup>13</sup>C NMR spectral of 15 $\beta$ -hydroxy-17 $\alpha$ -methyltestosterone (**15 $\beta$ -OH-mT**) (CDCl<sub>3</sub>, 151 MHz)

Fig.S11. <sup>1</sup>H NMR spectral of 6 $\beta$ -hydroxy-17 $\alpha$ -methyltestosterone (**6 $\beta$ -OH-17mT**) (CDCl<sub>3</sub>, 600 MHz)

Fig.S12. <sup>13</sup>C NMR spectral of 6 $\beta$ -hydroxy-17 $\alpha$ -methyltestosterone (**6 $\beta$ -OH-17mT**) (CDCl<sub>3</sub>, 151 MHz)

Fig.S13. <sup>1</sup>H NMR spectral of 6 $\beta$ -hydroxy-17 $\alpha$ -methyltestosterone (**6 $\beta$ -OH-17mT**) (THF, 600 MHz)

Fig.S14. <sup>13</sup>C NMR spectral of 6 $\beta$ -hydroxy-17 $\alpha$ -methyltestosterone (**6 $\beta$ -OH-17mT**) (THF, 151 MHz)

Fig.S15. HSQC spectral of 6 $\beta$ -hydroxy-17 $\alpha$ -methyltestosterone (**6 $\beta$ -OH-17mT**) (THF, 151 MHz)

Fig.S16. COSY spectral of 6 $\beta$ -hydroxy-17 $\alpha$ -methyltestosterone (**6 $\beta$ -OH-17mT**) (THF, 151 MHz)

Fig.S17. <sup>1</sup>H NMR spectral of 6 $\beta$ ,12 $\beta$ -dihydroxy-17 $\alpha$ -methyltestosterone (**6 $\beta$ ,12 $\beta$ -OH-17mT**) (CDCl<sub>3</sub>, 600 MHz)

Fig.S18. <sup>1</sup>H NMR spectral of 6 $\beta$ ,12 $\beta$ -dihydroxy-17 $\alpha$ -methyltestosterone (**6 $\beta$ ,12 $\beta$ -OH-17mT**) (DMSO, 600 MHz)

Fig.S19.  $^{13}\text{C}$  NMR spectral of  $6\beta,12\beta$ -dihydroxy- $17\alpha$ -methyltestosterone ( **$6\beta,12\beta$ -OH-17mT**) (DMSO, 151 MHz)

Fig.S20. HSQC spectral of  $6\beta,12\beta$ -dihydroxy- $17\alpha$ -methyltestosterone ( **$6\beta,12\beta$ -OH-17mT**) (DMSO, 151 MHz)

Fig.S21. COSY spectral of  $6\beta,12\beta$ -dihydroxy- $17\alpha$ -methyltestosterone ( **$6\beta,12\beta$ -OH-17mT**) (DMSO, 151 MHz)

Fig.S22.  $^1\text{H}$  NMR spectral of  $3\beta,7\alpha$ -dihydroxyandrost-5-ene-17-one ( **$7\alpha$ -OH-DHEA**) ( $\text{CDCl}_3$ , 600 MHz)

Fig.S23.  $^{13}\text{C}$  NMR spectral of  $3\beta,7\alpha$ -dihydroxyandrost-5-ene-17-one ( **$7\alpha$ -OH-DHEA**) ( $\text{CDCl}_3$ , 151 MHz)

Fig.S24. HSQC spectral of  $3\beta,7\alpha$ -dihydroxyandrost-5-ene-17-one ( **$7\alpha$ -OH-DHEA**) ( $\text{CDCl}_3$ , 151 MHz)

Fig.S25. COSY spectral of  $3\beta,7\alpha$ -dihydroxyandrost-5-ene-17-one ( **$7\alpha$ -OH-DHEA**) ( $\text{CDCl}_3$ , 151 MHz)

Fig.S26.  $^1\text{H}$  NMR spectral of  $3\beta,7\beta$ -dihydroxyandrost-5-ene-17-one ( **$7\beta$ -OH-DHEA**) ( $\text{CDCl}_3$ , 600 MHz)

Fig.S27.  $^{13}\text{C}$  NMR spectral of  $3\beta,7\beta$ -dihydroxyandrost-5-ene-17-one ( **$7\beta$ -OH-DHEA**) ( $\text{CDCl}_3$ , 151 MHz)

Fig.S28. HSQC spectral of  $3\beta,7\beta$ -dihydroxyandrost-5-ene-17-one ( **$7\beta$ -OH-DHEA**) ( $\text{CDCl}_3$ , 151 MHz)

Fig.S29.  $^1\text{H}$  NMR spectral of  $3\beta$ -hydroxyandrost-5-ene-7,17-dione ( **$7$ -oxo-DHEA**) ( $\text{CDCl}_3$ , 600 MHz)

Fig.S30.  $^{13}\text{C}$  NMR spectral of  $3\beta$ -hydroxyandrost-5-ene-7,17-dione ( **$7$ -oxo-DHEA**) ( $\text{CDCl}_3$ , 151 MHz)

Fig.S31. HSQC spectral of  $3\beta$ -hydroxyandrost-5-ene-7,17-dione ( **$7$ -oxo-DHEA**) ( $\text{CDCl}_3$ , 151 MHz)

Fig.S32. COSY spectral of  $3\beta$ -hydroxyandrost-5-ene-7,17-dione ( **$7$ -oxo-DHEA**) ( $\text{CDCl}_3$ , 151 MHz)

Fig.S33.  $^1\text{H}$  NMR spectral of  $3\beta,7\alpha$ -dihydroxy- $17\alpha$ -oxa-D-homo-androst-5-en-17-one ( **$7\alpha$ -OH-DHEA-lactone**) ( $\text{CDCl}_3$ , 600 MHz)

Fig.S34.  $^{13}\text{C}$  NMR spectral of  $3\beta,7\alpha$ -dihydroxy- $17\alpha$ -oxa-D-homo-androst-5-en-17-one ( **$7\alpha$ -OH-DHEA-lactone**) ( $\text{CDCl}_3$ , 151 MHz)

Fig.S35. HSQC spectral of  $3\beta,7\alpha$ -dihydroxy- $17\alpha$ -oxa-D-homo-androst-5-en-17-one ( **$7\alpha$ -OH-DHEA-lactone**) ( $\text{CDCl}_3$ , 151 MHz)

Fig.S36.  $^1\text{H}$  NMR spectral of  $3\beta,7\beta$ -dihydroxy- $17\alpha$ -oxa-D-homo-androst-5-en-17-one ( **$7\beta$ -OH-DHEA-lactone**) ( $\text{CDCl}_3$ , 600 MHz)

Fig.S37.  $^{13}\text{C}$  NMR spectral of  $3\beta,7\beta$ -dihydroxy- $17\alpha$ -oxa-D-homo-androst-5-en-17-one ( **$7\beta$ -OH-DHEA-lactone**) ( $\text{CDCl}_3$ , 151 MHz)

Fig.S38. HSQC spectral of  $3\beta,7\beta$ -dihydroxy- $17\alpha$ -oxa-D-homo-androst-5-en-17-one ( **$7\beta$ -OH-DHEA-lactone**) ( $\text{CDCl}_3$ , 151 MHz)

Fig.S39. GC-MS spectra of  $7\alpha$ -hydroxyandrost-4-ene-3,17-dione ( **$7\alpha$ -OH-AD**)

Fig.S40. Enlarged GC-MS spectra of  $7\alpha$ -hydroxyandrost-4-ene-3,17-dione ( **$7\alpha$ -OH-AD**)

Fig.S41. GC-MS spectra of  $6\beta$ -hydroxyandrost-4-ene-3,11,17-trione ( **$6\beta$ -OH-Adr**)

Fig.S42. Enlarged GC-MS spectra of  $6\beta$ -hydroxyandrost-4-ene-3,11,17-trione ( **$6\beta$ -OH-Adr**)

Fig.S43. GC-MS spectra of  $15\beta$ -hydroxy- $17\alpha$ -methyltestosterone ( **$15\beta$ -OH-17mT**)

Fig.S44. GC-MS spectra of  $6\beta$ -hydroxy- $17\alpha$ -methyltestosterone ( **$6\beta$ -OH-17mT**)

- Fig.S45. GC-MS spectra of 6 $\beta$ ,12 $\beta$ -dihydroxy-17 $\alpha$ -methyltestosterone (**6 $\beta$ ,12 $\beta$ -OH-17mT**)
- Fig.S46. Enlarged GC-MS spectra of 6 $\beta$ ,12 $\beta$ -dihydroxy-17 $\alpha$ -methyltestosterone (**6 $\beta$ ,12 $\beta$ -OH-17mT**)
- Fig.S47. GC-MS spectra of 3 $\beta$ ,7 $\alpha$ -dihydroxyandrost-5-ene-17-one (**7 $\alpha$ -OH-DHEA**)
- Fig.S48. Enlarged GC-MS spectra of 3 $\beta$ ,7 $\alpha$ -dihydroxyandrost-5-ene-17-one (**7 $\alpha$ -OH-DHEA**)
- Fig.S49. GC-MS spectra of 3 $\beta$ ,7 $\beta$ -dihydroxyandrost-5-ene-17-one (**7 $\beta$ -OH-DHEA**)
- Fig.S50. Enlarged GC-MS spectra of 3 $\beta$ ,7 $\beta$ -dihydroxyandrost-5-ene-17-one (**7 $\beta$ -OH-DHEA**)
- Fig.S51. GC-MS spectra of 3 $\beta$ -hydroxyandrost-5-ene-7,17-dione (**7-oxo-DHEA**)
- Fig.S52. Enlarged GC-MS spectra of 3 $\beta$ -hydroxyandrost-5-ene-7,17-dione (**7-oxo-DHEA**)
- Fig.S53. GC-MS spectra of 3 $\beta$ ,7 $\alpha$ -dihydroxy-17 $\alpha$ -oxa-D-homo-androst-5-en-17-one (**7 $\alpha$ -OH-DHEA-lactone**)
- Fig.S54. Enlarged GC-MS spectra of 3 $\beta$ ,7 $\alpha$ -dihydroxy-17 $\alpha$ -oxa-D-homo-androst-5-en-17-one (**7 $\alpha$ -OH-DHEA-lactone**)
- Fig.S55. GC-MS spectra of 3 $\beta$ ,7 $\beta$ -dihydroxy-17 $\alpha$ -oxa-D-homo-androst-5-en-17-one (**7 $\beta$ -OH-DHEA-lactone**)
- Fig.S56. Enlarged GC-MS spectra of 3 $\beta$ ,7 $\beta$ -dihydroxy-17 $\alpha$ -oxa-D-homo-androst-5-en-17-one (**7 $\beta$ -OH-DHEA-lactone**)

Fig.S1.  $^1\text{H}$  NMR spectral of  $7\alpha$ -hydroxyandrost-4-ene-3,17-dione ( $7\alpha$ -OH-AD)  
( $\text{CDCl}_3$ , 600 MHz)

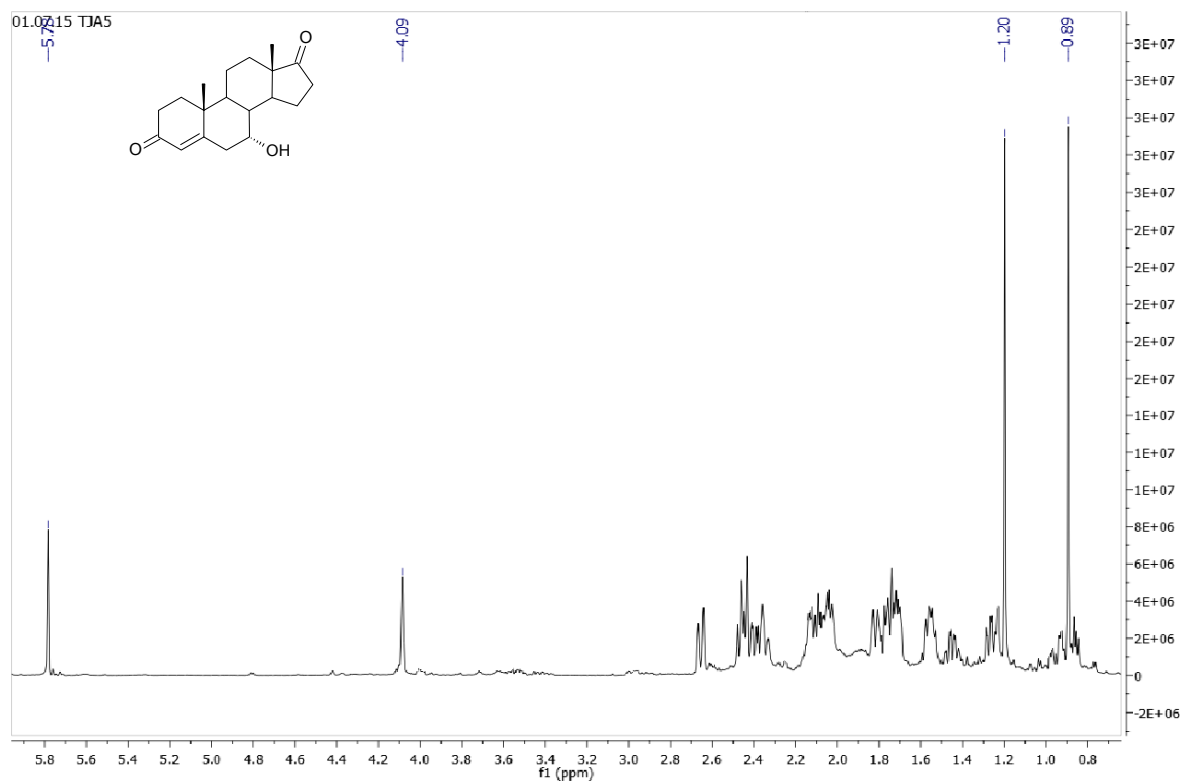

Fig.S2.  $^{13}\text{C}$  NMR spectral of  $7\alpha$ -hydroxyandrost-4-ene-3,17-dione ( $7\alpha$ -OH-AD)  
( $\text{CDCl}_3$ , 151 MHz)

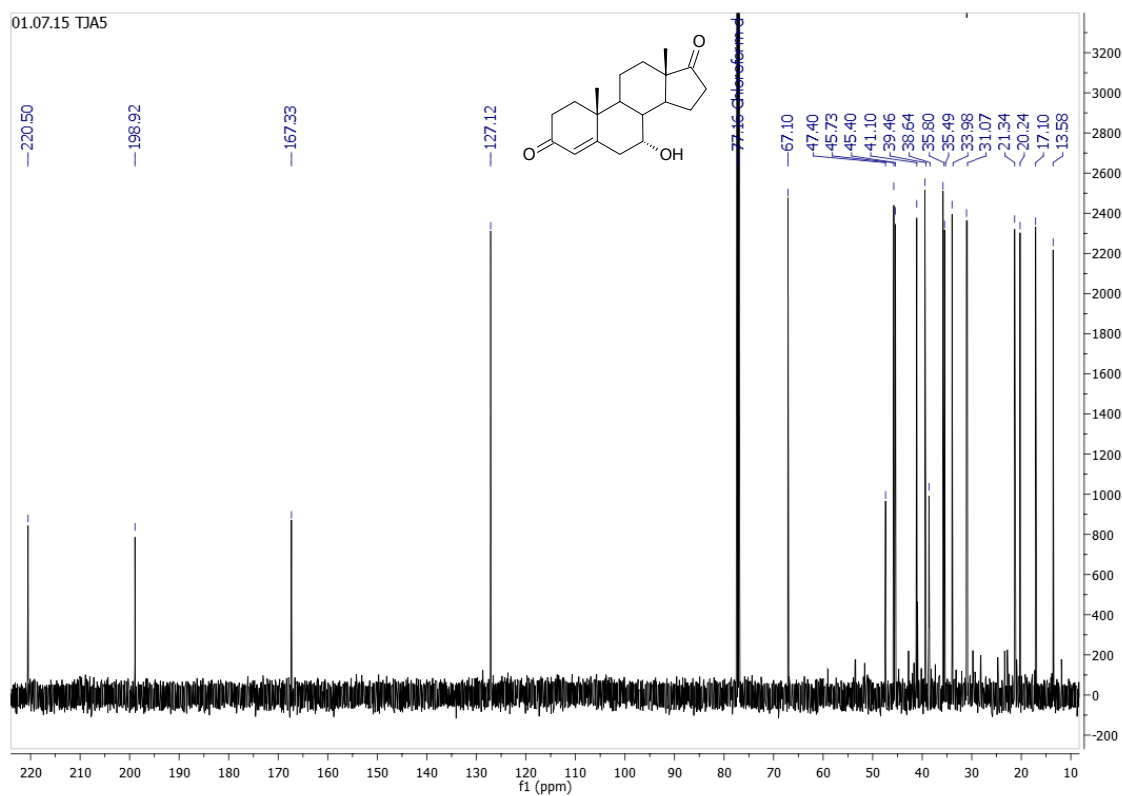

Fig.S3. HSQC spectral of 7 $\alpha$ -hydroxyandrost-4-ene-3,17-dione (**7 $\alpha$ -OH-AD**)  
(CDCl<sub>3</sub>, 151 MHz)

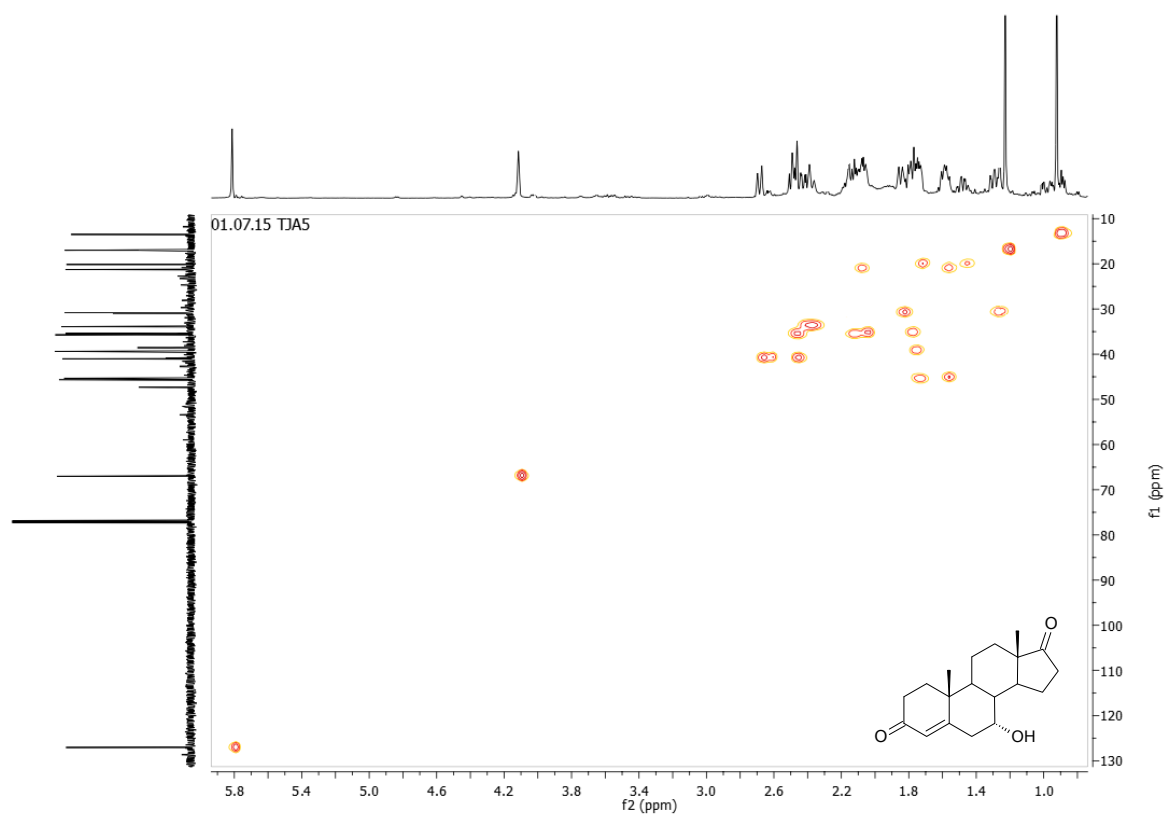

Fig.S4. COSY spectral of 7 $\alpha$ -hydroxyandrost-4-ene-3,17-dione (**7 $\alpha$ -OH-AD**)  
(CDCl<sub>3</sub>, 151 MHz)

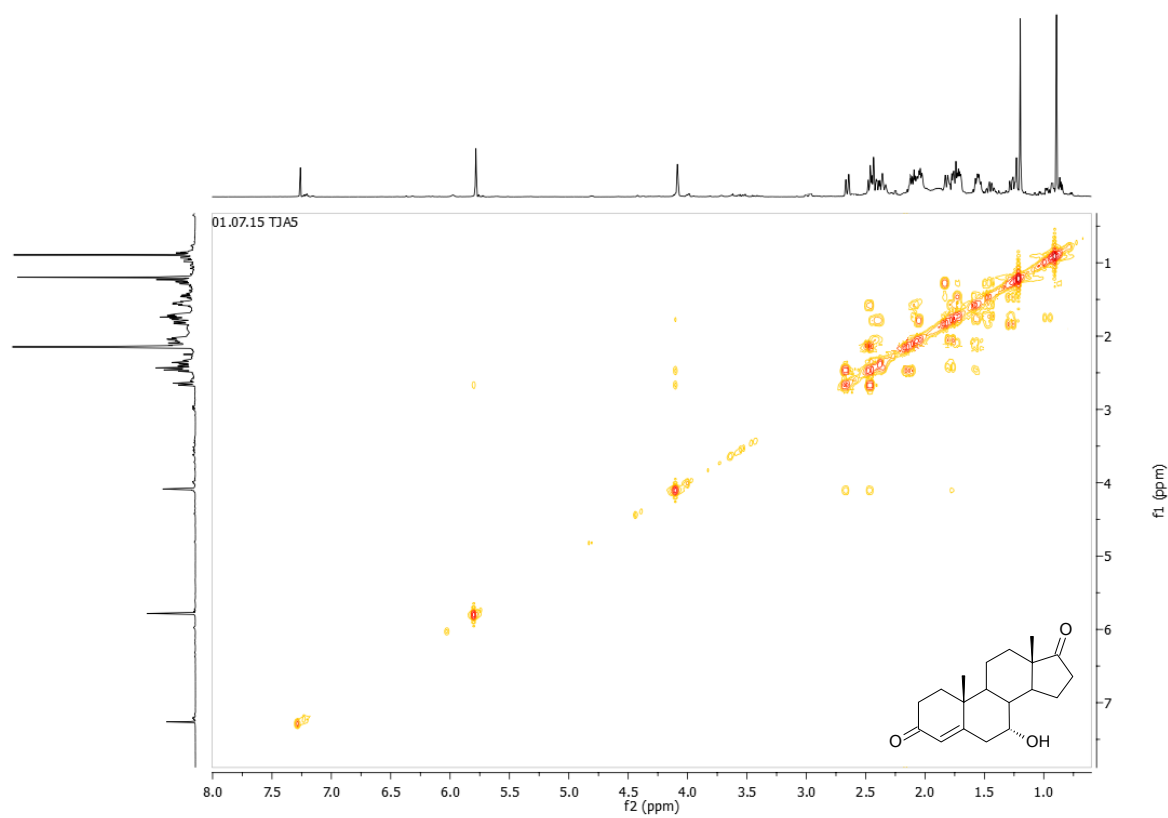

Fig.S5.  $^1\text{H}$  NMR spectral of 6 $\beta$ -hydroxyandrost-4-ene-3,11,17-trione (**6 $\beta$ -OH-Adr**) ( $\text{CDCl}_3$ , 600 MHz)

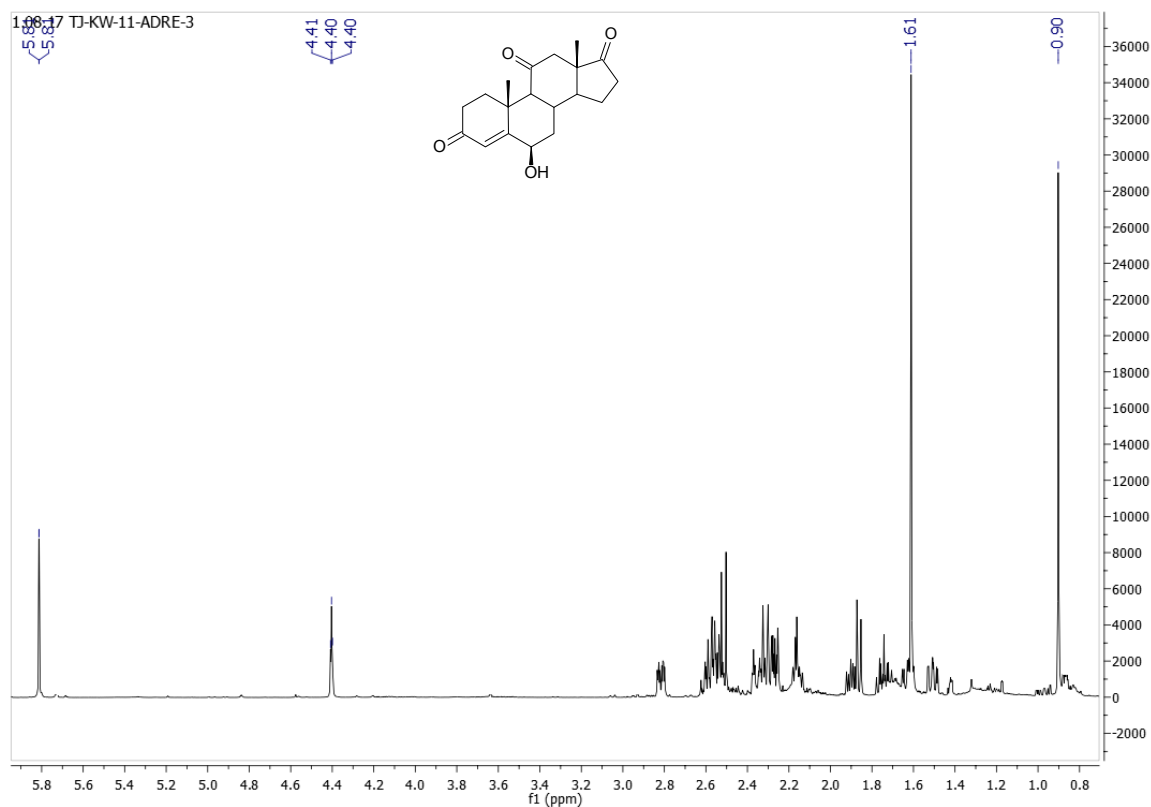

Fig.S6.  $^{13}\text{C}$  NMR spectral of 6 $\beta$ -hydroxyandrost-4-ene-3,11,17-trione (**6 $\beta$ -OH-Adr**) ( $\text{CDCl}_3$ , 151 MHz)

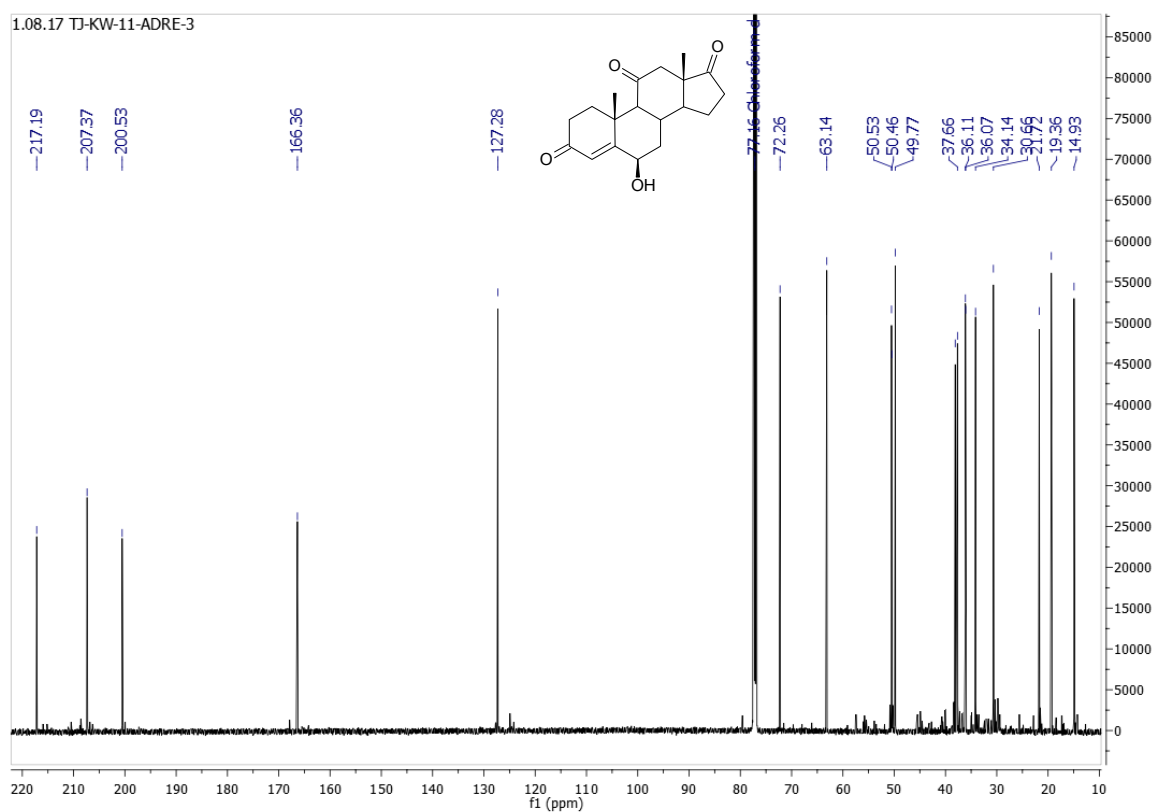

Fig.S7. HSQC spectral of 6 $\beta$ -hydroxyandrost-4-ene-3,11,17-trione (**6 $\beta$ -OH-Adr**) (CDCl<sub>3</sub>, 151 MHz)

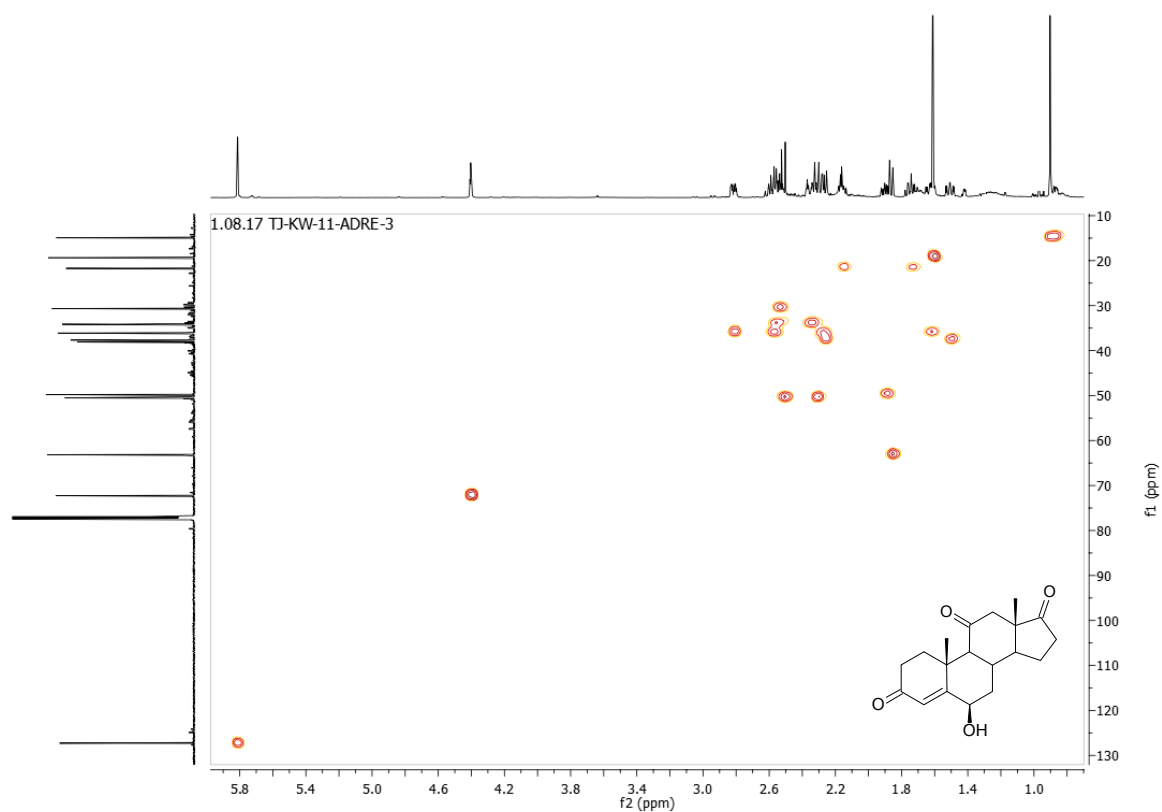

Fig.S8. COSY spectral of 6 $\beta$ -hydroxyandrost-4-ene-3,11,17-trione (**6 $\beta$ -OH-Adr**) (CDCl<sub>3</sub>, 151 MHz)

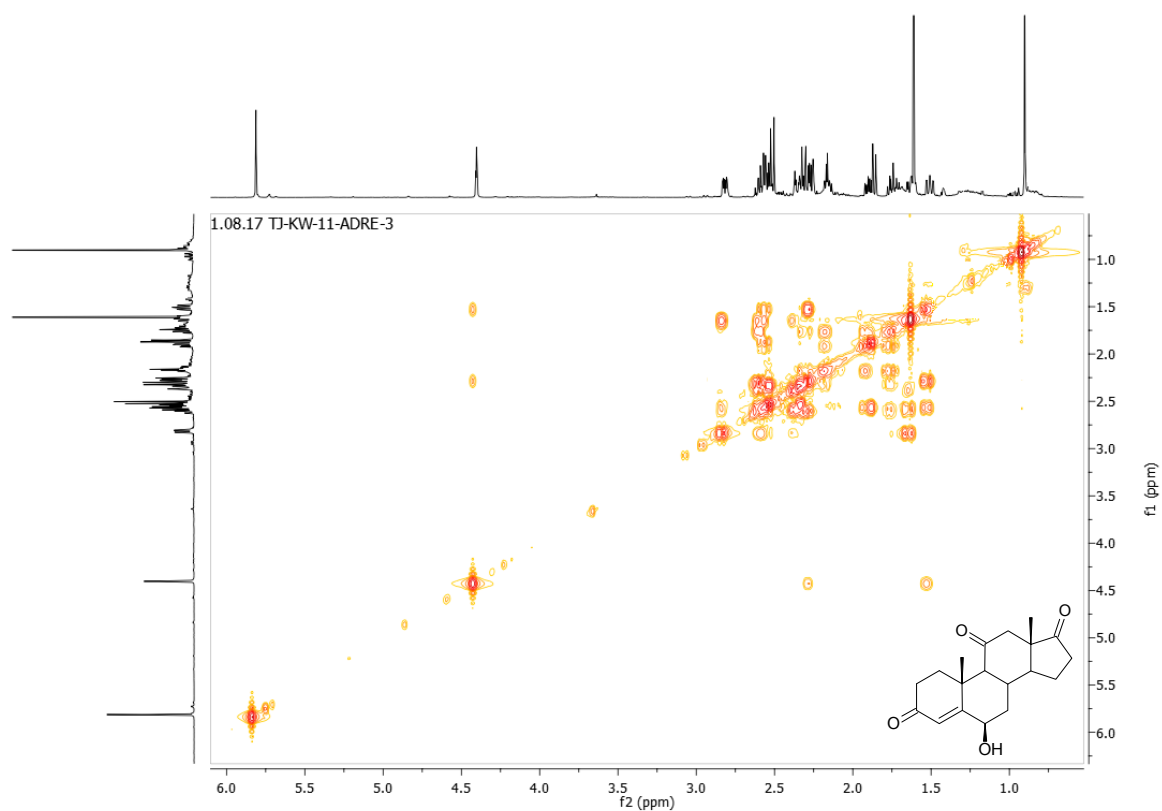

Fig.S9.  $^1\text{H}$  NMR spectral of 15 $\beta$ -hydroxy-17 $\alpha$ -methyltestosterone (**15 $\beta$ -OH-mT**) (CDCl<sub>3</sub>, 600 MHz)

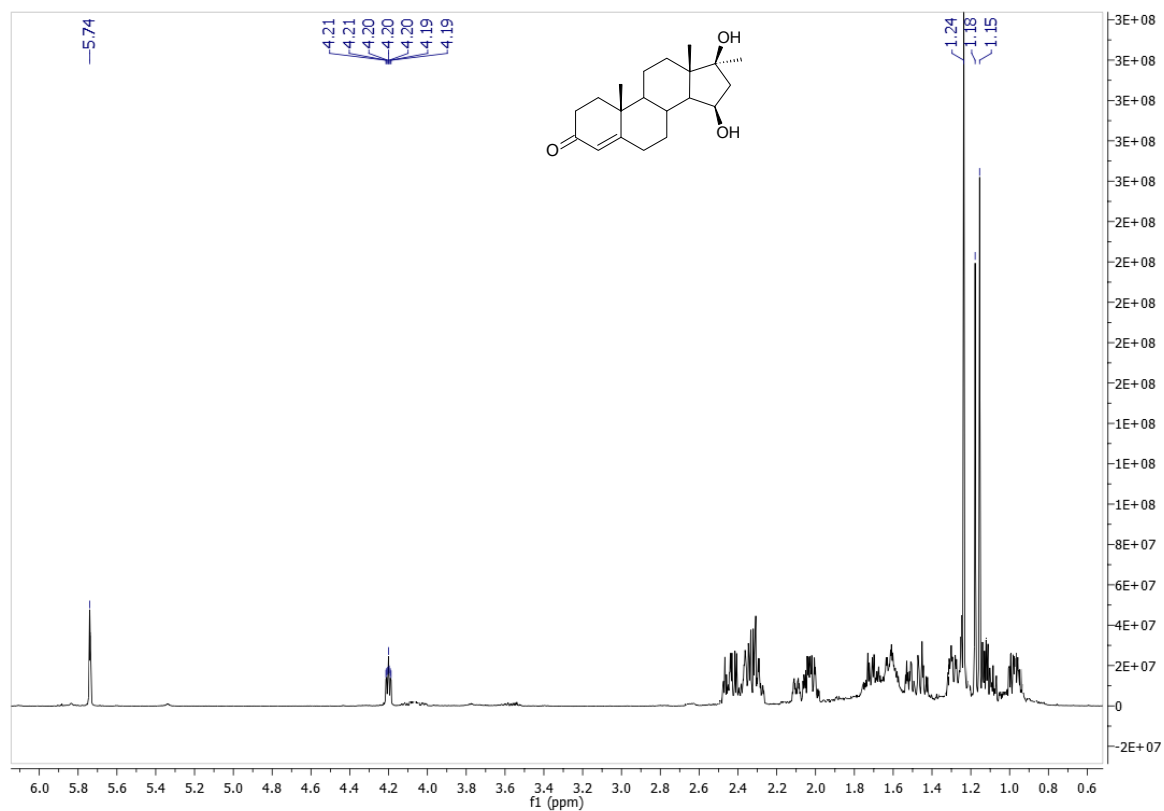

Fig.S10.  $^{13}\text{C}$  NMR spectral of 15 $\beta$ -hydroxy-17 $\alpha$ -methyltestosterone (**15 $\beta$ -OH-mT**) (CDCl<sub>3</sub>, 151 MHz)

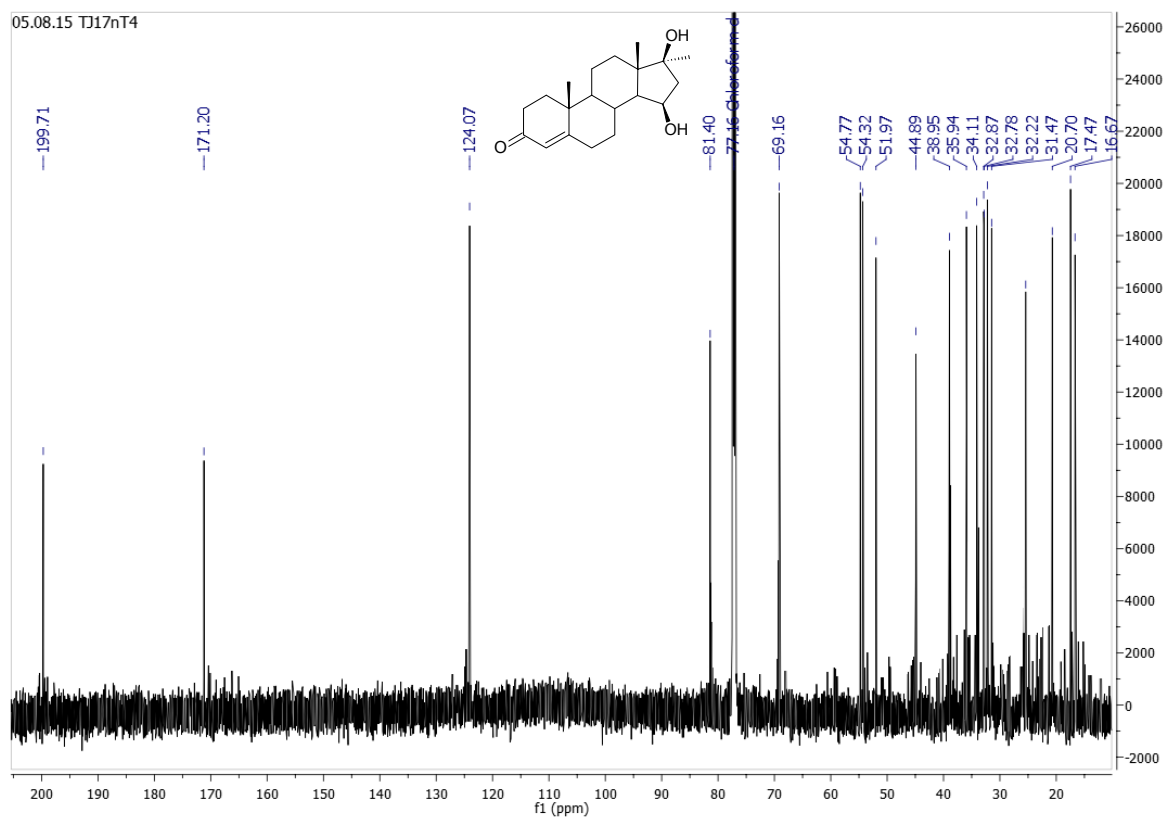



Fig.S11.  $^1\text{H}$  NMR spectral of 6 $\beta$ -hydroxy-17 $\alpha$ -methyltestosterone (6 $\beta$ -OH-mT) (CDCl<sub>3</sub>, 600 MHz)

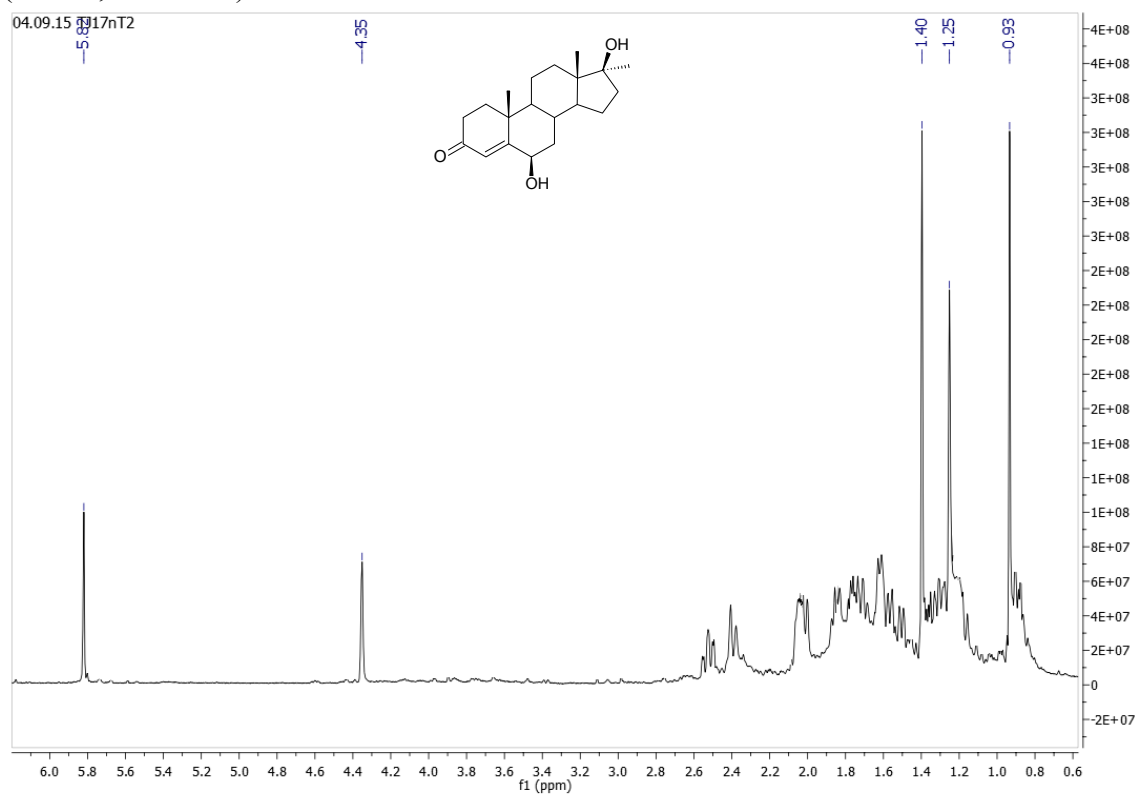

Fig.S12.  $^{13}\text{C}$  NMR spectral of 6 $\beta$ -hydroxy-17 $\alpha$ -methyltestosterone (6 $\beta$ -OH-mT) (CDCl<sub>3</sub>, 151 MHz)

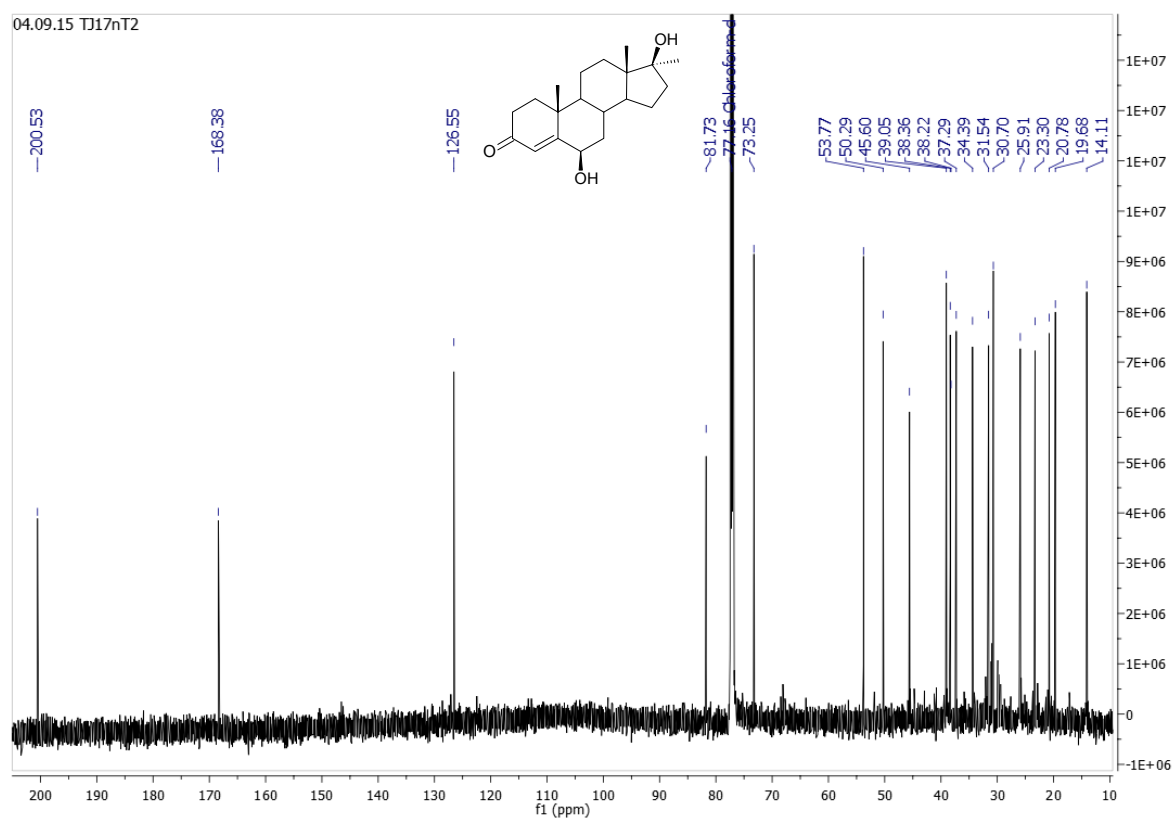

Fig.S13.  $^1\text{H}$  NMR spectral of  $6\beta$ -hydroxy- $17\alpha$ -methyltestosterone ( $6\beta$ -OH-mT) (THF, 600 MHz)

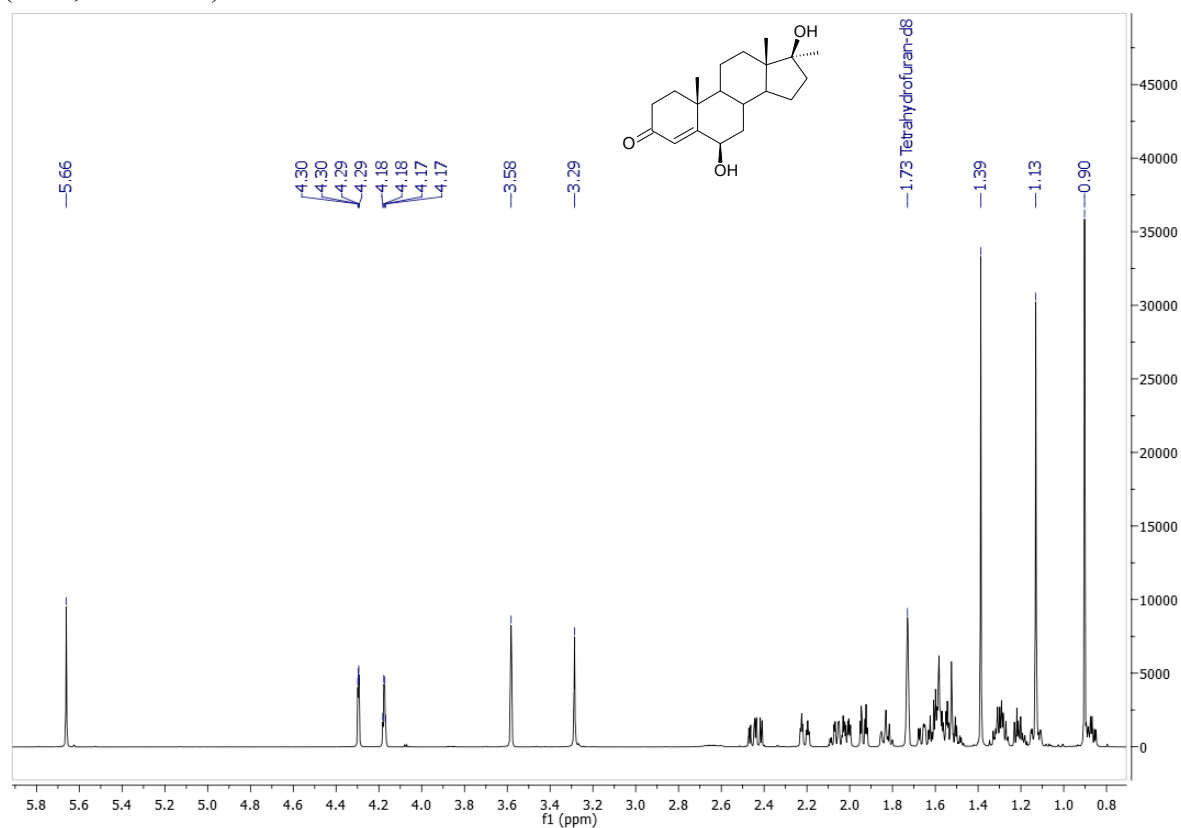

Fig.S14.  $^{13}\text{C}$  NMR spectral of  $6\beta$ -hydroxy- $17\alpha$ -methyltestosterone ( $6\beta$ -OH-mT) (THF, 151 MHz)

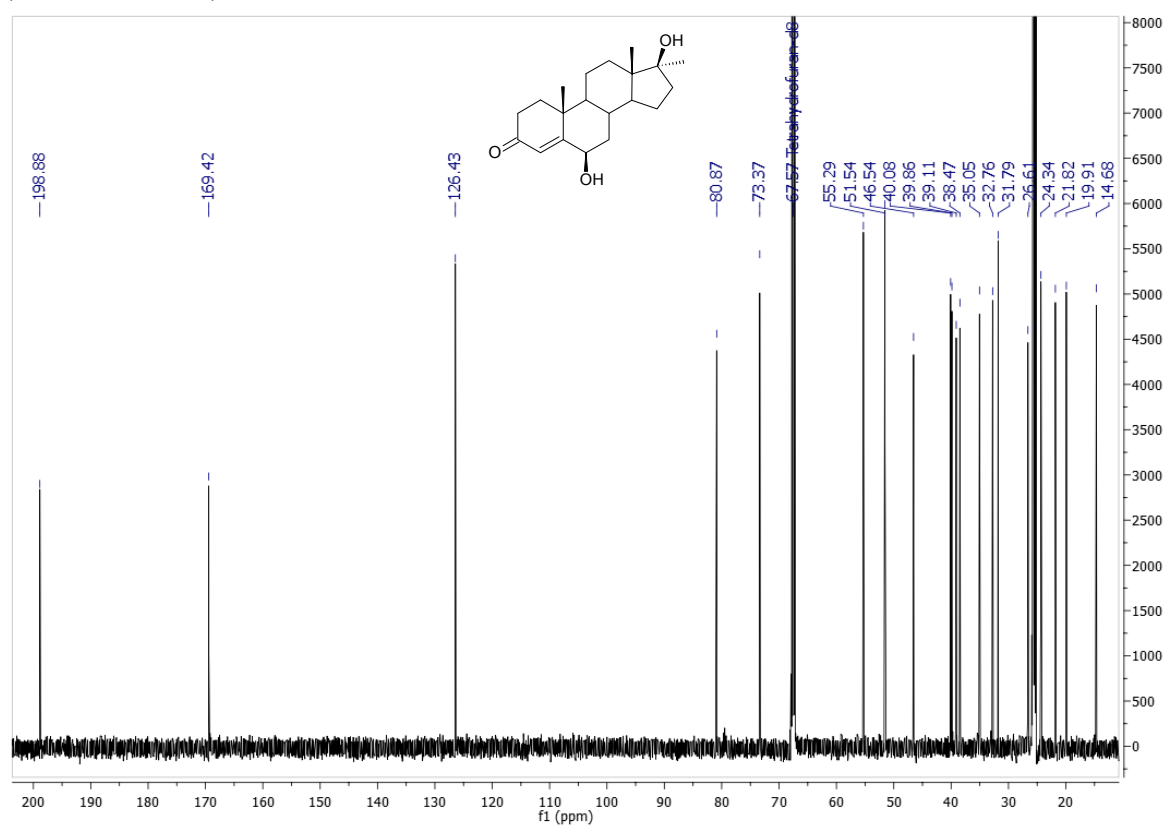

Fig.S15. HSQC spectral of 6 $\beta$ -hydroxy-17 $\alpha$ -methyltestosterone (6 $\beta$ -OH-mT)  
(THF, 151 MHz)

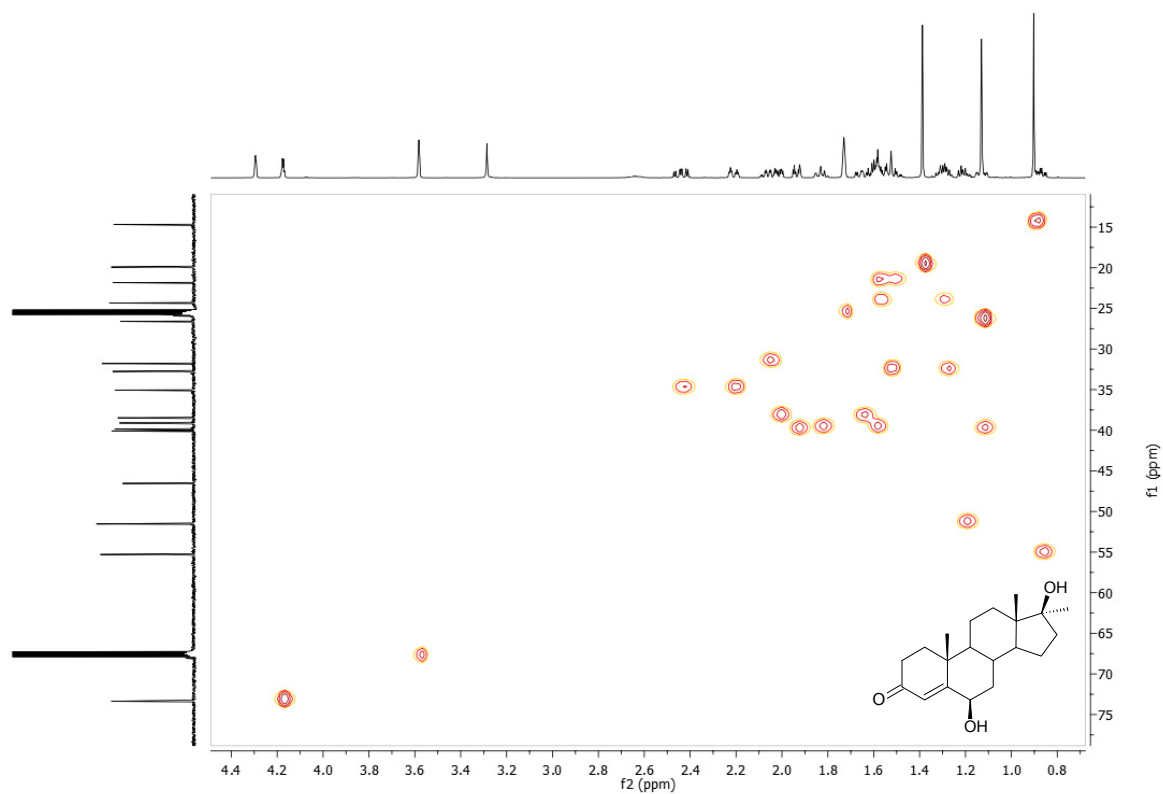

Fig.S16. COSY spectral of 6 $\beta$ -hydroxy-17 $\alpha$ -methyltestosterone (6 $\beta$ -OH-mT)  
(THF, 151 MHz)

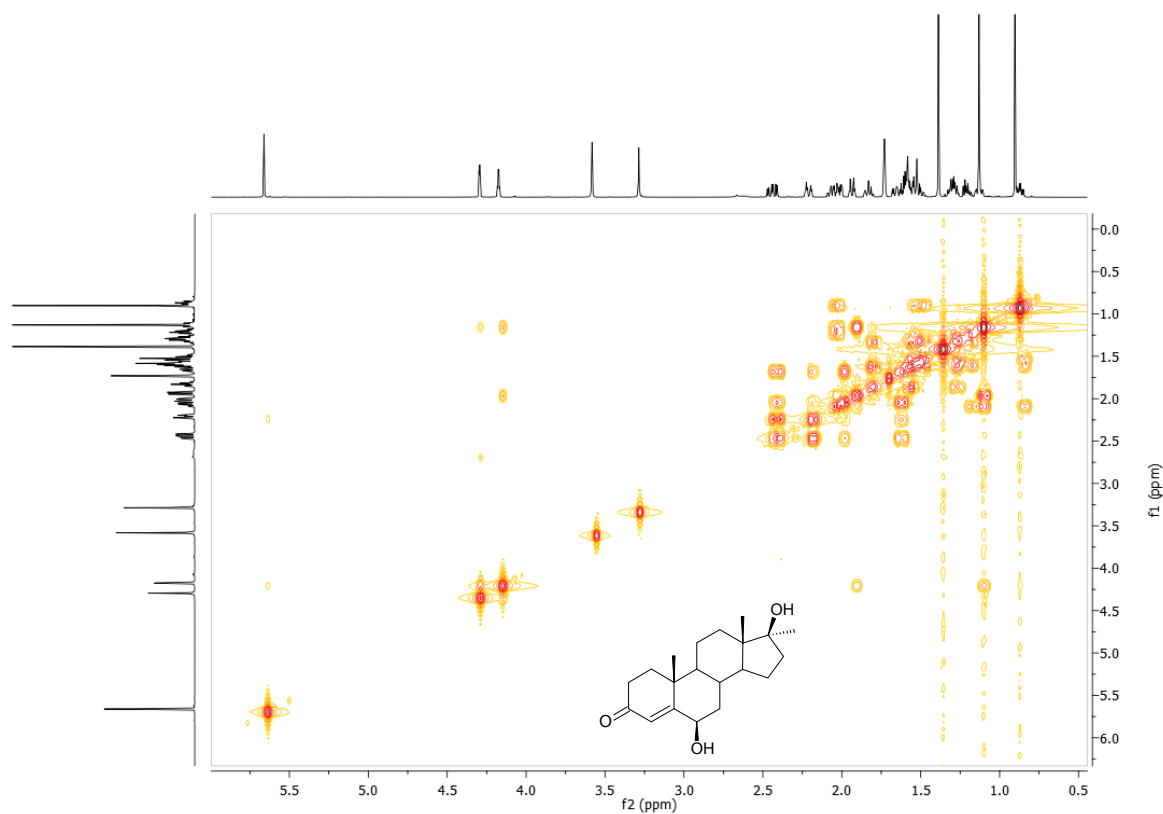

Fig.S17.  $^1\text{H}$  NMR spectral of  $6\beta,12\beta$ -dihydroxy- $17\alpha$ -methyltestosterone ( $6\beta,12\beta$ -OH-mT) ( $\text{CDCl}_3$ , 600 MHz)

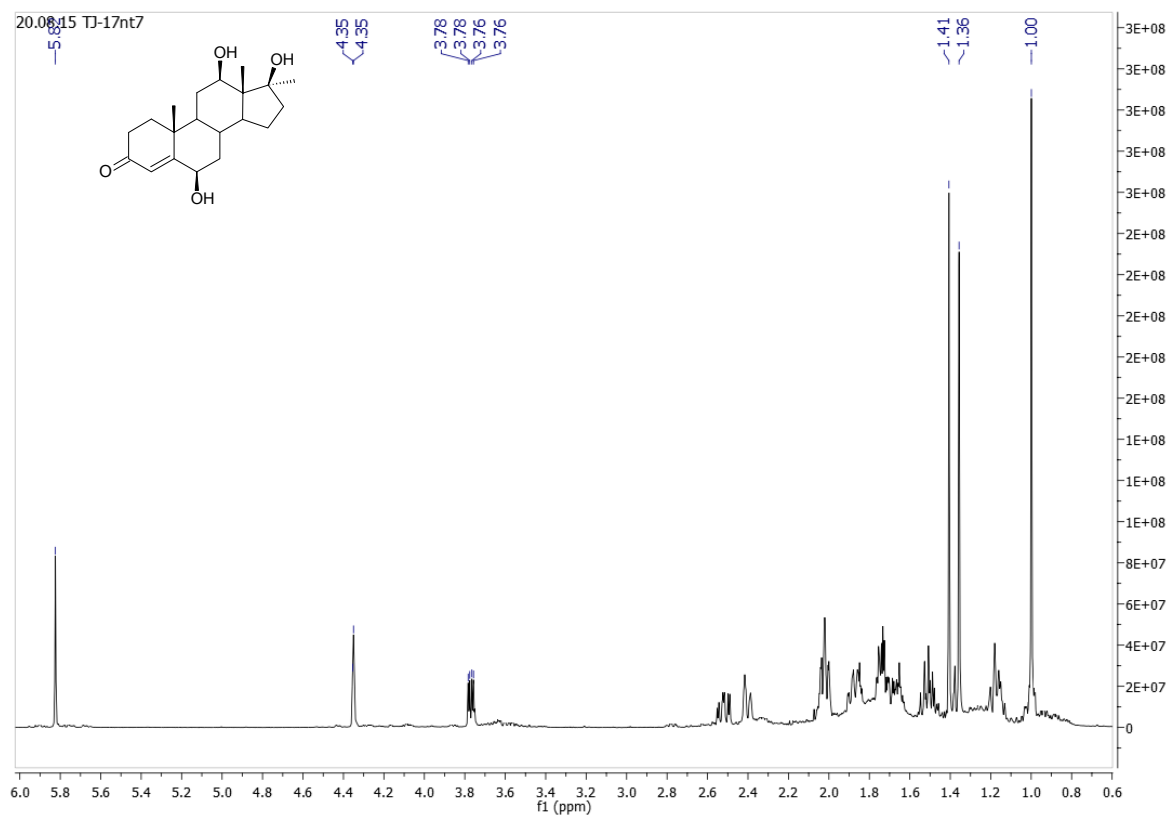

Fig.S18.  $^1\text{H}$  NMR spectral of  $6\beta,12\beta$ -dihydroxy- $17\alpha$ -methyltestosterone ( $6\beta,12\beta$ -OH-mT) ( $\text{DMSO}$ , 600 MHz)

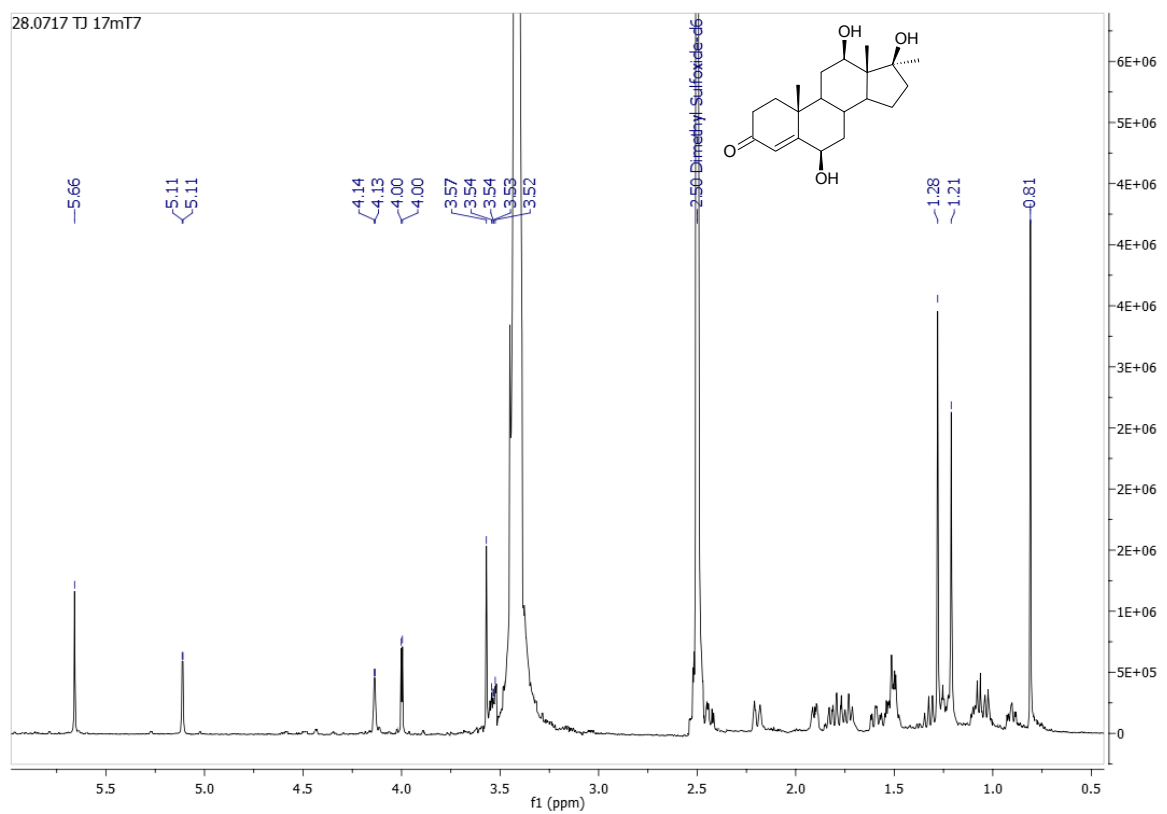

Fig.S19.  $^{13}\text{C}$  NMR spectral of  $6\beta,12\beta$ -dihydroxy- $17\alpha$ -methyltestosterone ( $6\beta,12\beta$ -OH-mT) (DMSO, 151 MHz)

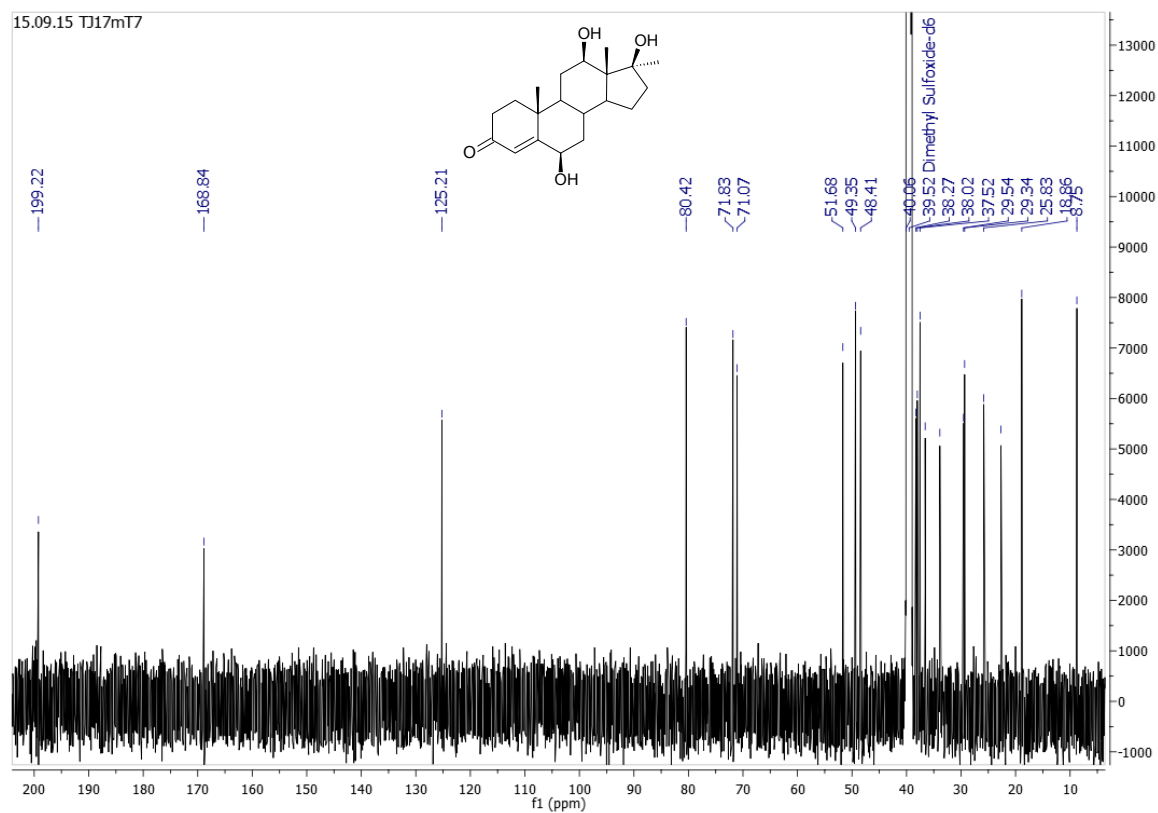

Fig.S20. HSQC spectral of  $6\beta,12\beta$ -dihydroxy- $17\alpha$ -methyltestosterone ( $6\beta,12\beta$ -OH-mT) (DMSO, 151 MHz)

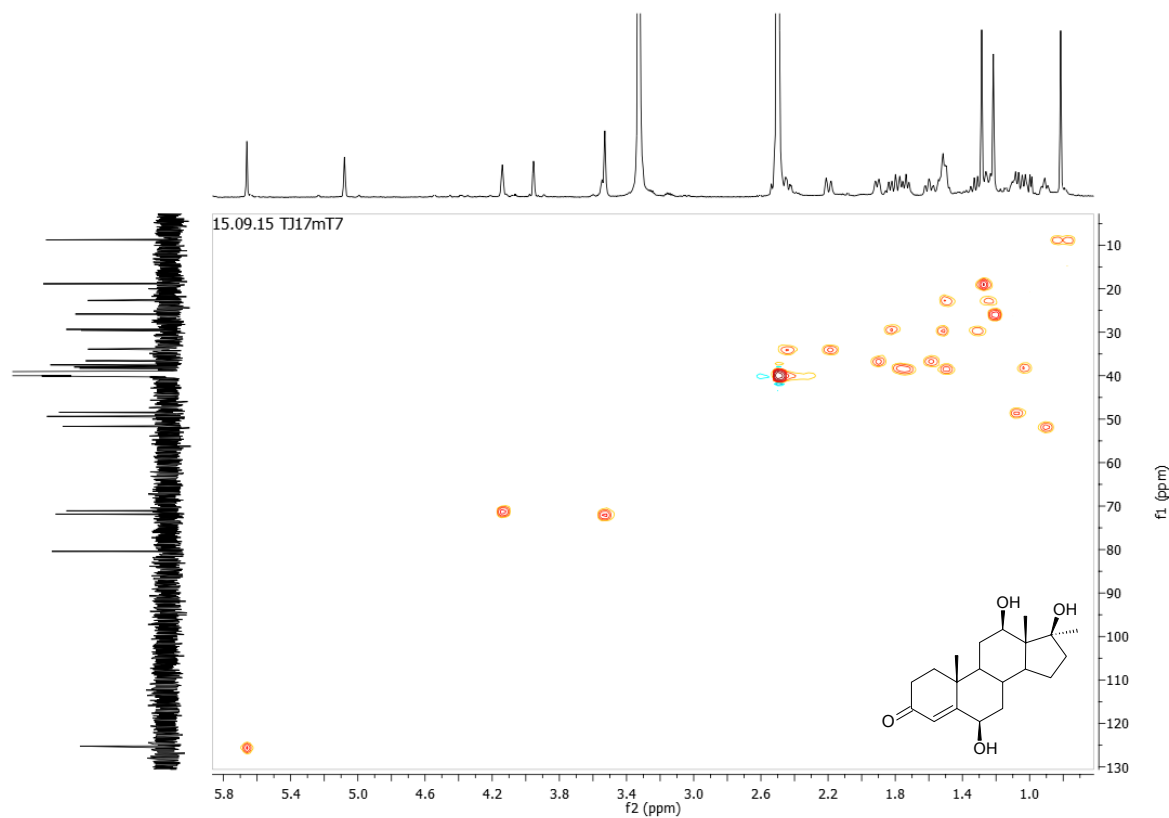

Fig.S21. COSY spectral of 6 $\beta$ ,12 $\beta$ -dihydroxy-17 $\alpha$ -methyltestosterone (6 $\beta$ ,12 $\beta$ -OH-mT) (DMSO, 151 MHz)

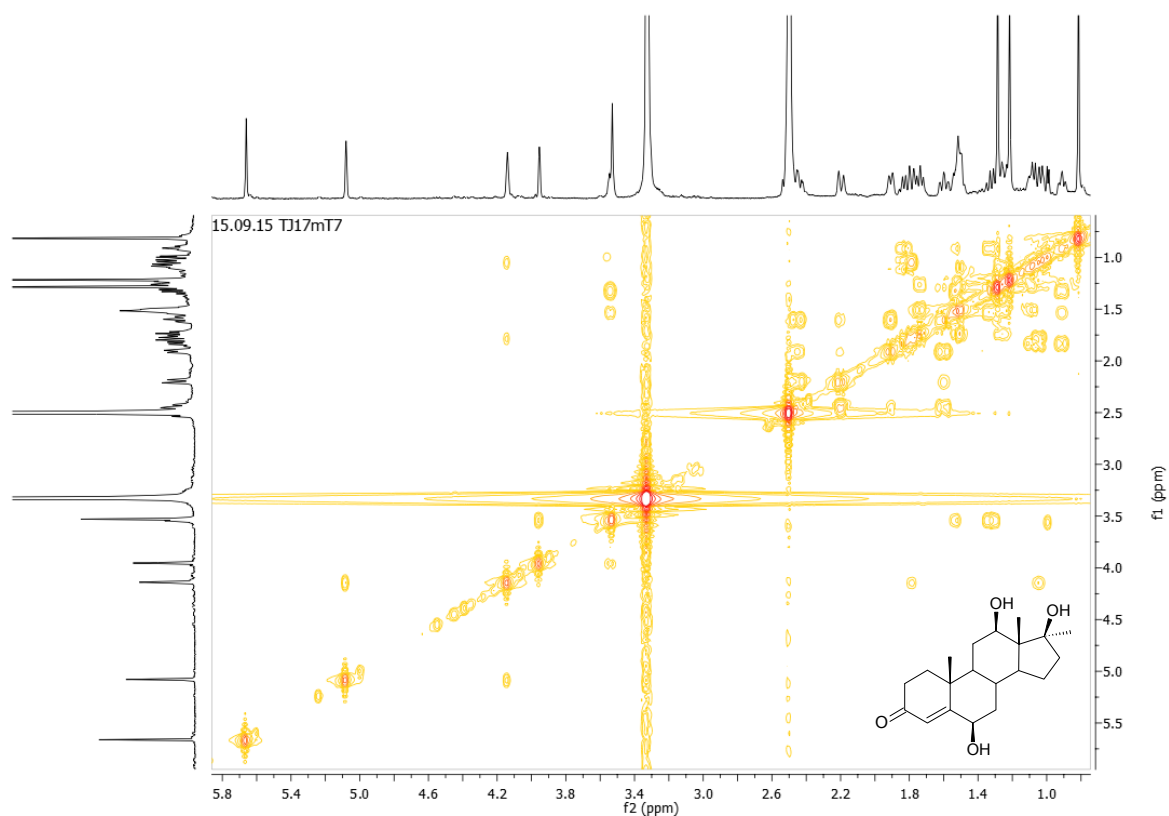

Fig.S22.  $^1\text{H}$  NMR spectral of 3 $\beta$ ,7 $\alpha$ -dihydroxyandrost-5-ene-17-one (7 $\alpha$ -OH-DHEA) ( $\text{CDCl}_3$ , 600 MHz)

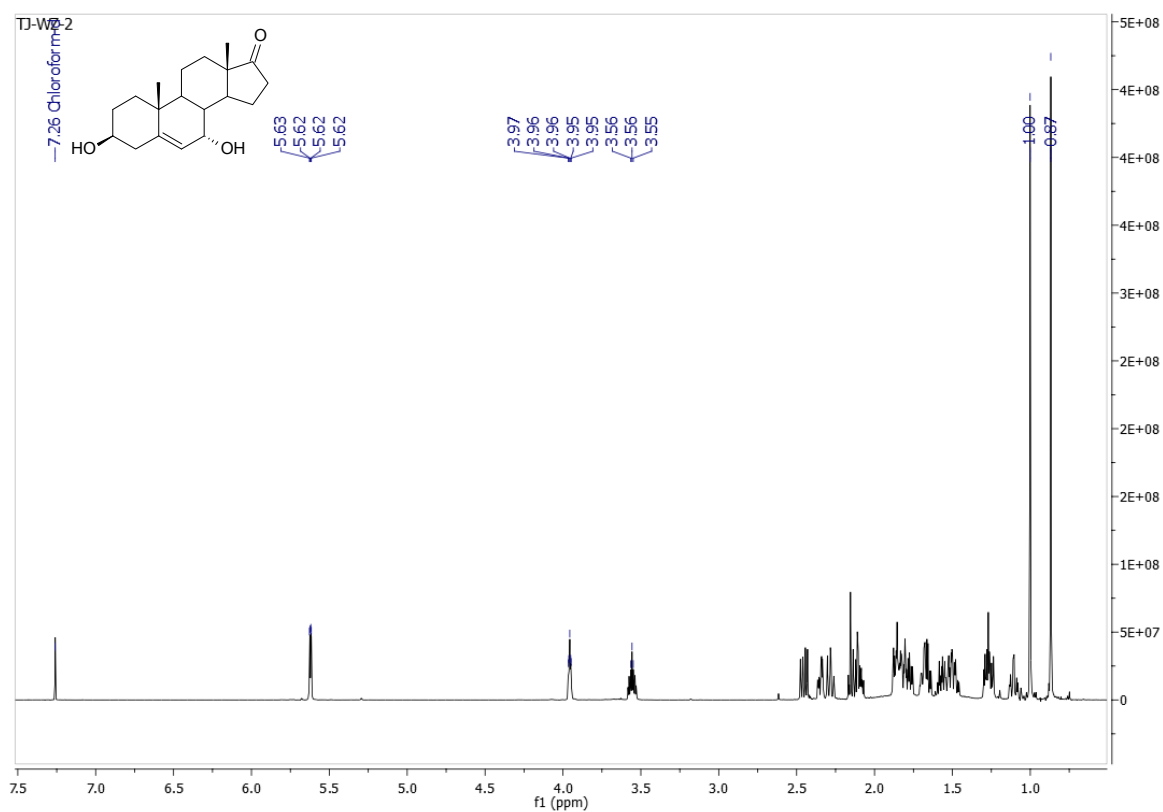

Fig.S23.  $^{13}\text{C}$  NMR spectral of  $3\beta,7\alpha$ -dihydroxyandrost-5-ene-17-one (**7 $\alpha$ -OH-DHEA**) ( $\text{CDCl}_3$ , 151 MHz)

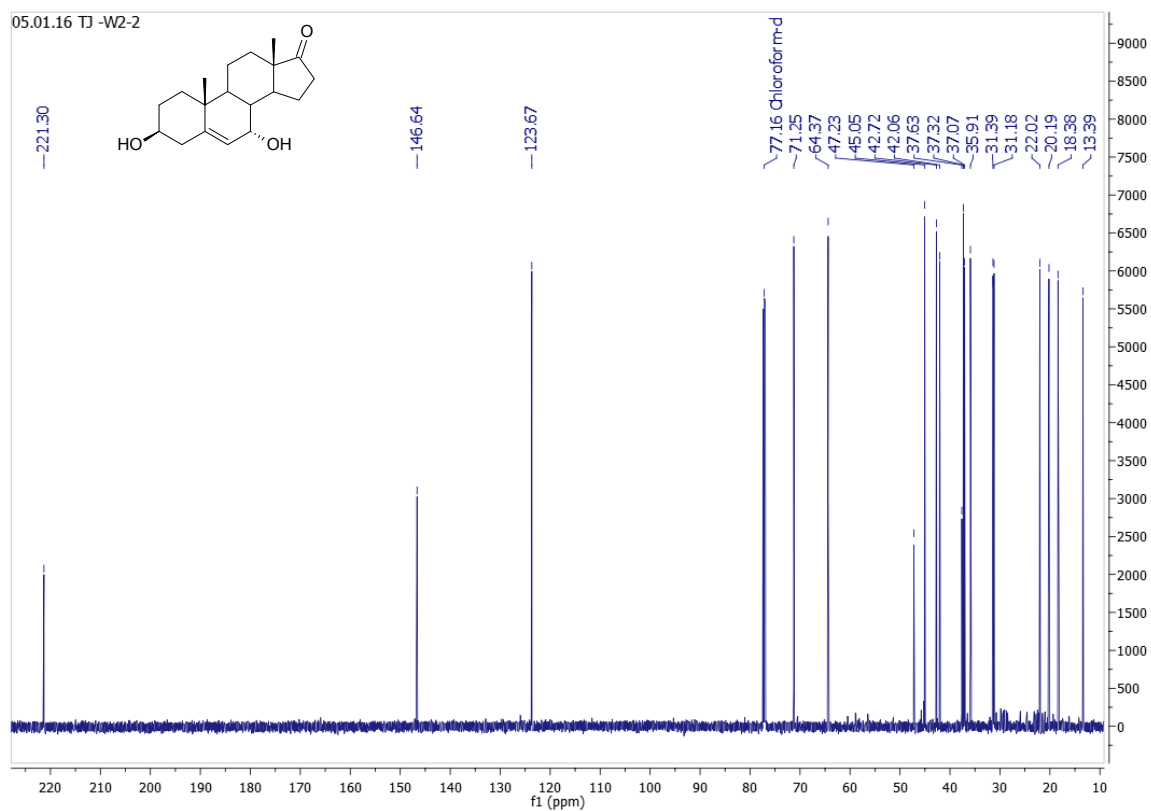

Fig.S24. HSQC spectral of  $3\beta,7\alpha$ -dihydroxyandrost-5-ene-17-one (**7 $\alpha$ -OH-DHEA**) ( $\text{CDCl}_3$ , 151 MHz)

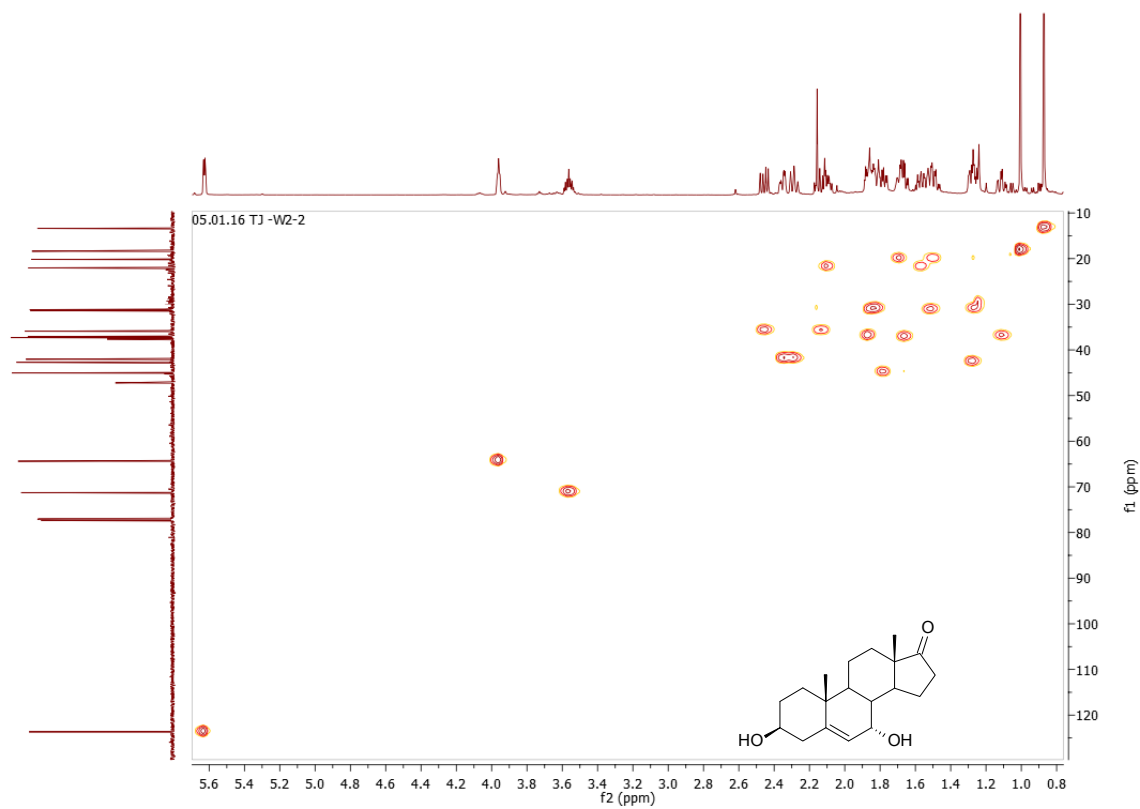

Fig.S25. COSY spectral of 3 $\beta$ ,7 $\alpha$ -dihydroxyandrost-5-ene-17-one (**7 $\alpha$ -OH-DHEA**) (CDCl<sub>3</sub>, 151 MHz)

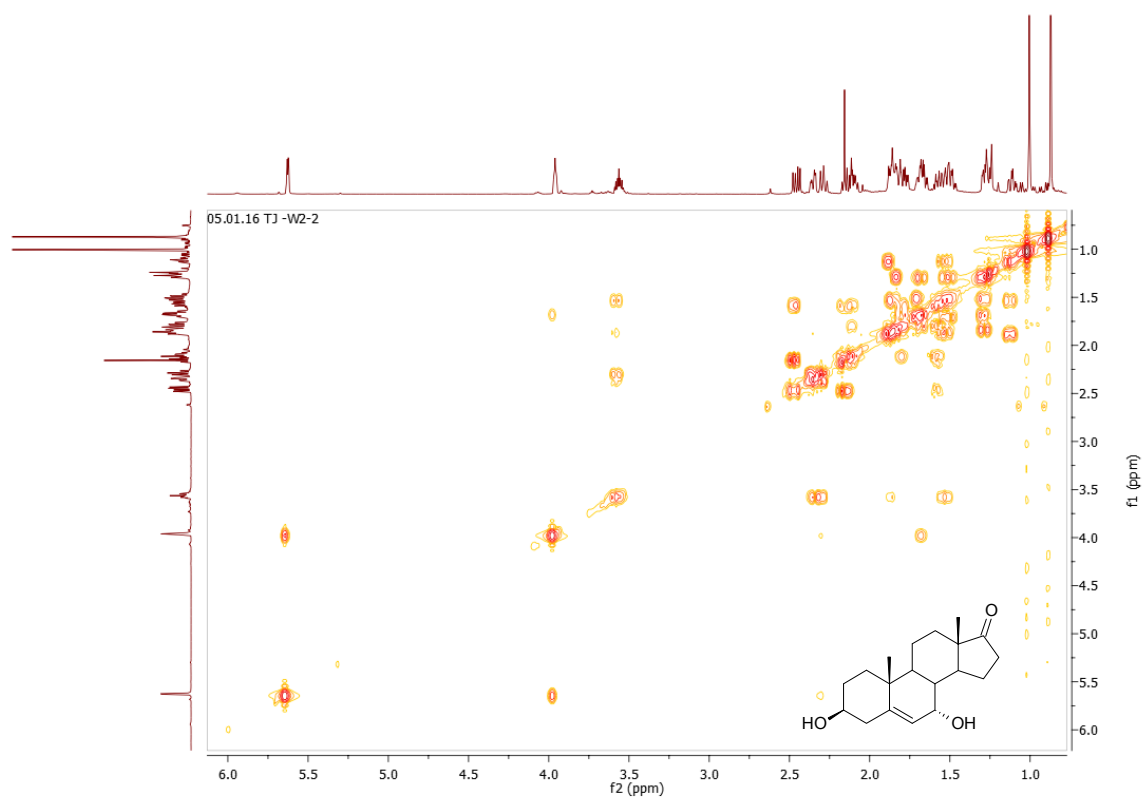

Fig.S26. <sup>1</sup>H NMR spectral of 3 $\beta$ ,7 $\beta$ -dihydroxyandrost-5-ene-17-one (**7 $\beta$ -OH-DHEA**) (CDCl<sub>3</sub>, 600 MHz)

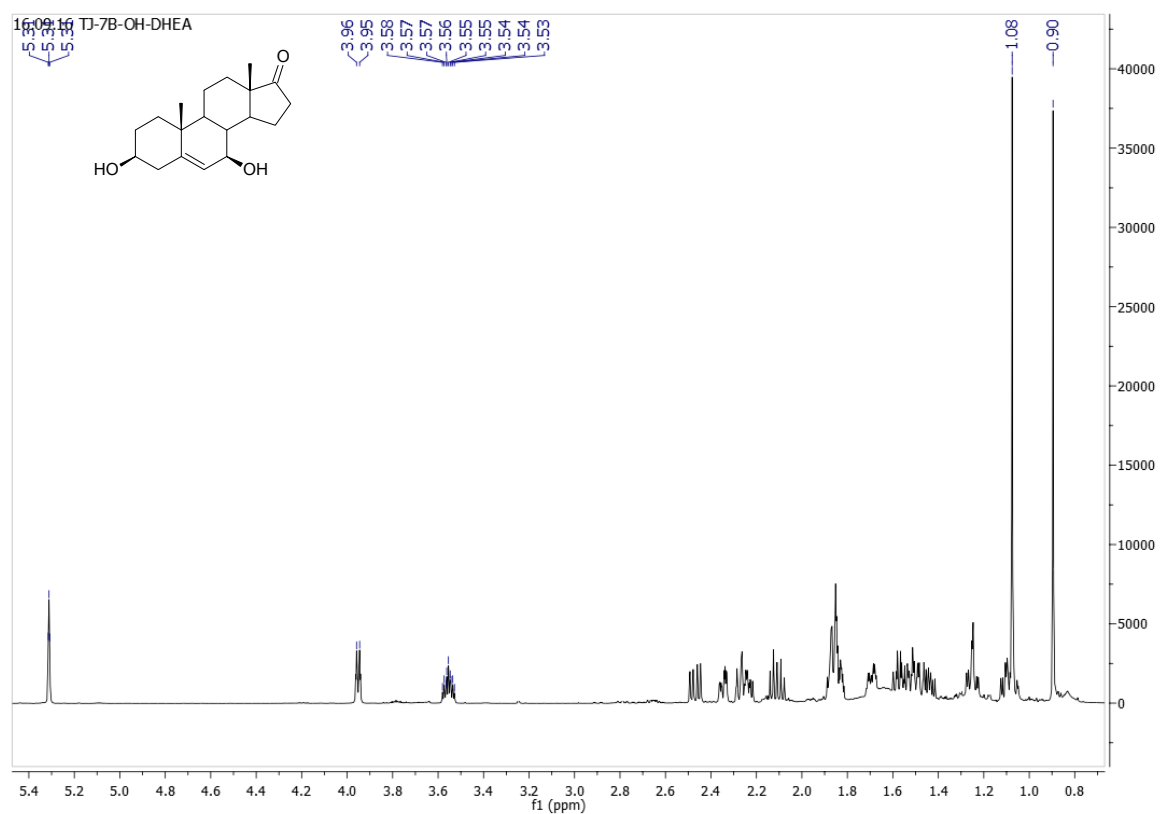



Fig.S27.  $^{13}\text{C}$  NMR spectral of  $3\beta,7\beta$ -dihydroxyandrost-5-ene-17-one (**7 $\beta$ -OH-DHEA**) ( $\text{CDCl}_3$ , 151 MHz)

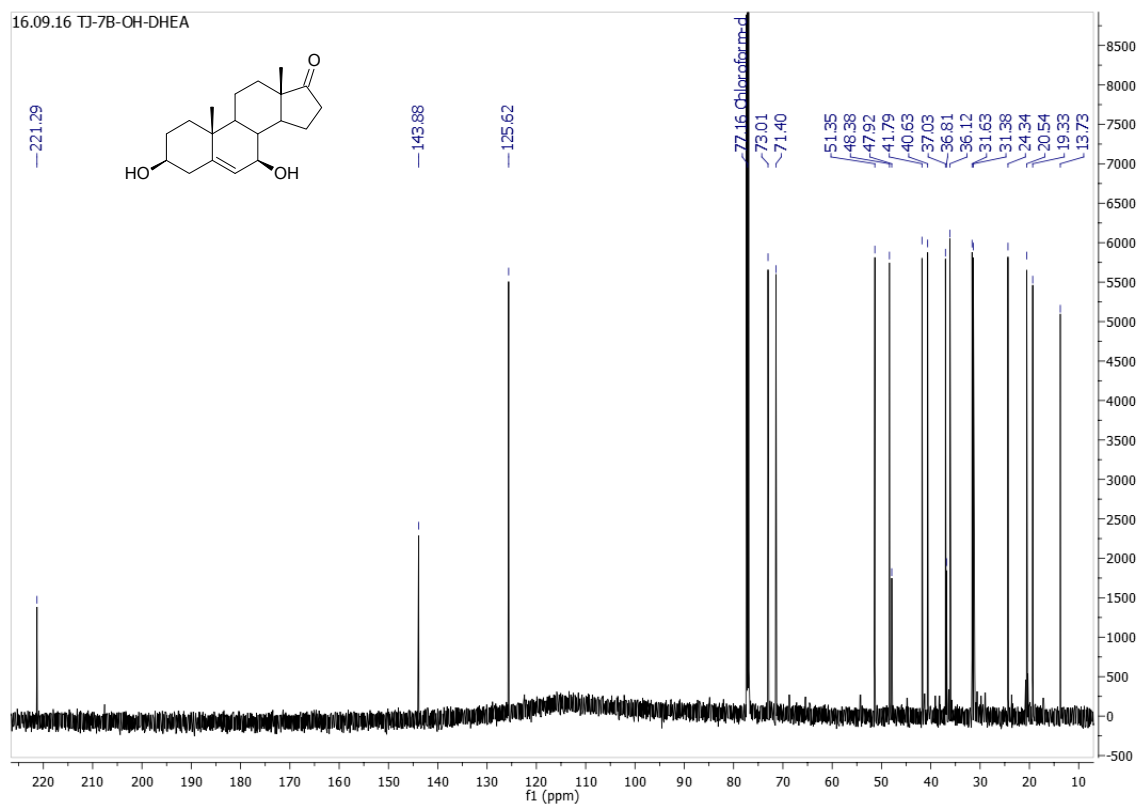

Fig.S28. HSQC spectral of  $3\beta,7\beta$ -dihydroxyandrost-5-ene-17-one (**7 $\beta$ -OH-DHEA**) ( $\text{CDCl}_3$ , 151 MHz)

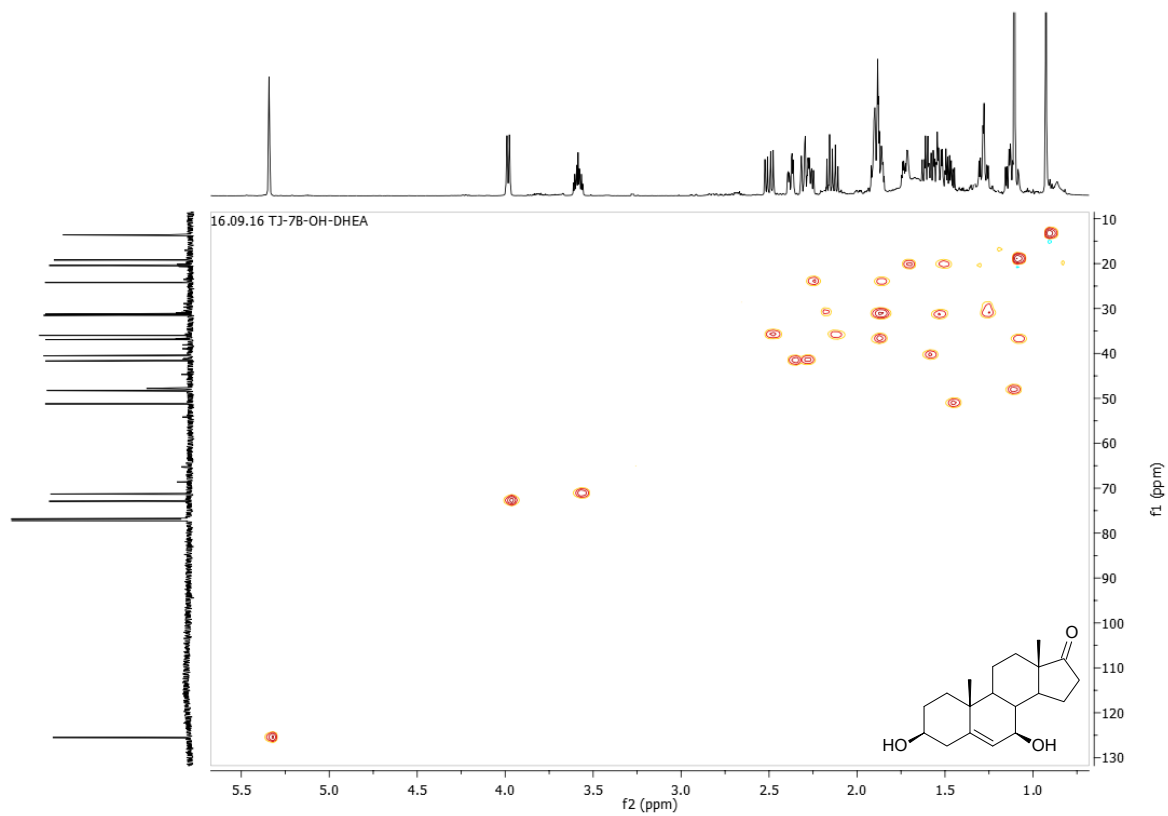

Fig.S29.  $^1\text{H}$  NMR spectral of  $3\beta$ -hydroxyandrost-5-ene-7,17-dione (**7-oxo-DHEA**) ( $\text{CDCl}_3$ , 600 MHz)

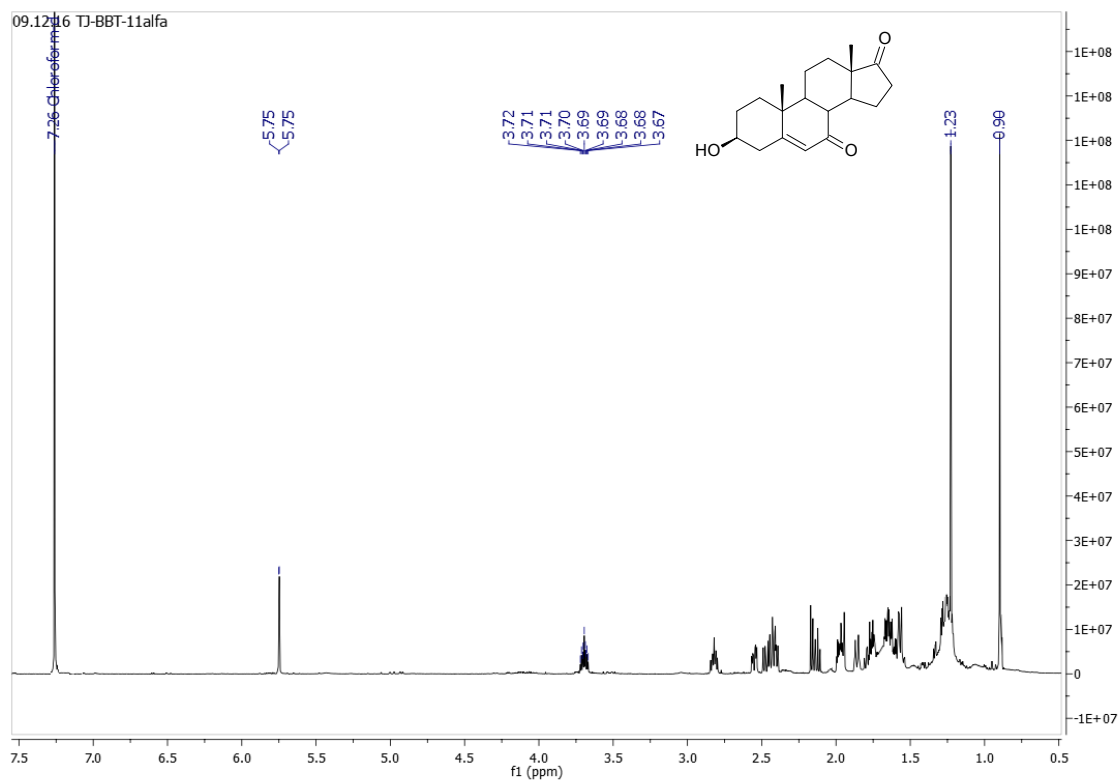

Fig.S30.  $^{13}\text{C}$  NMR spectral of  $3\beta$ -hydroxyandrost-5-ene-7,17-dione (**7-oxo-DHEA**) ( $\text{CDCl}_3$ , 151 MHz)

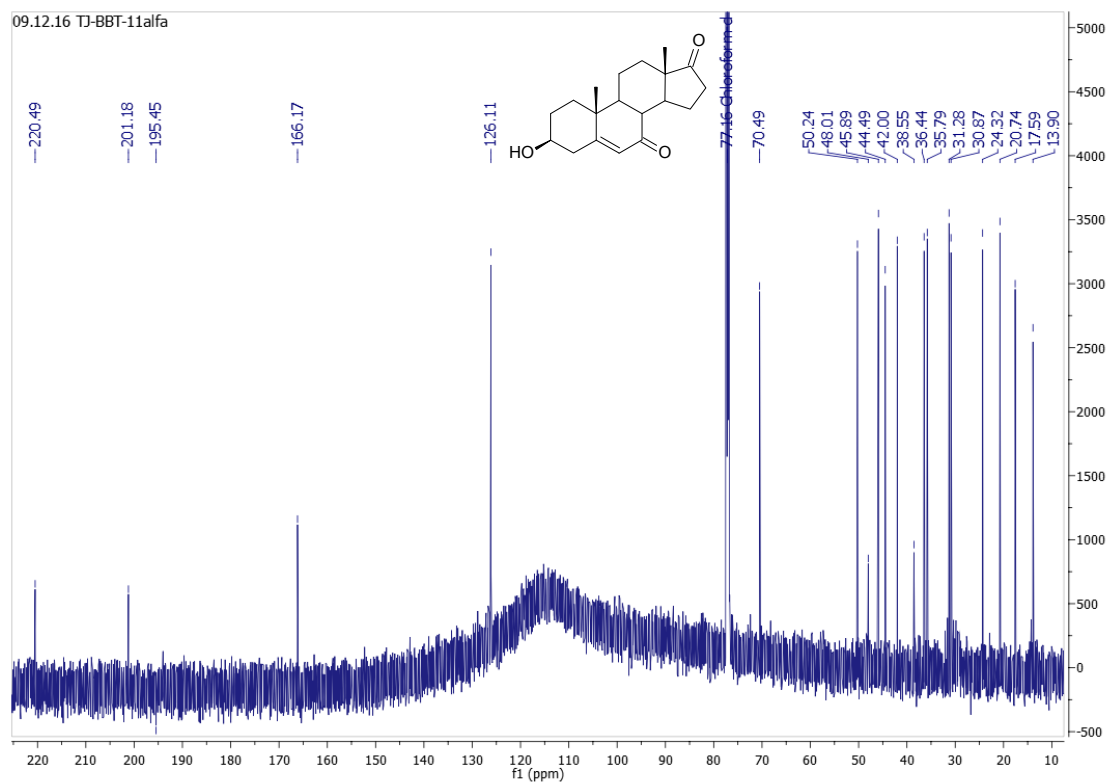

Fig.S31. HSQC spectral of 3 $\beta$ -hydroxyandrost-5-ene-7,17-dione (**7-oxo-DHEA**)  
(CDCl<sub>3</sub>, 151 MHz)

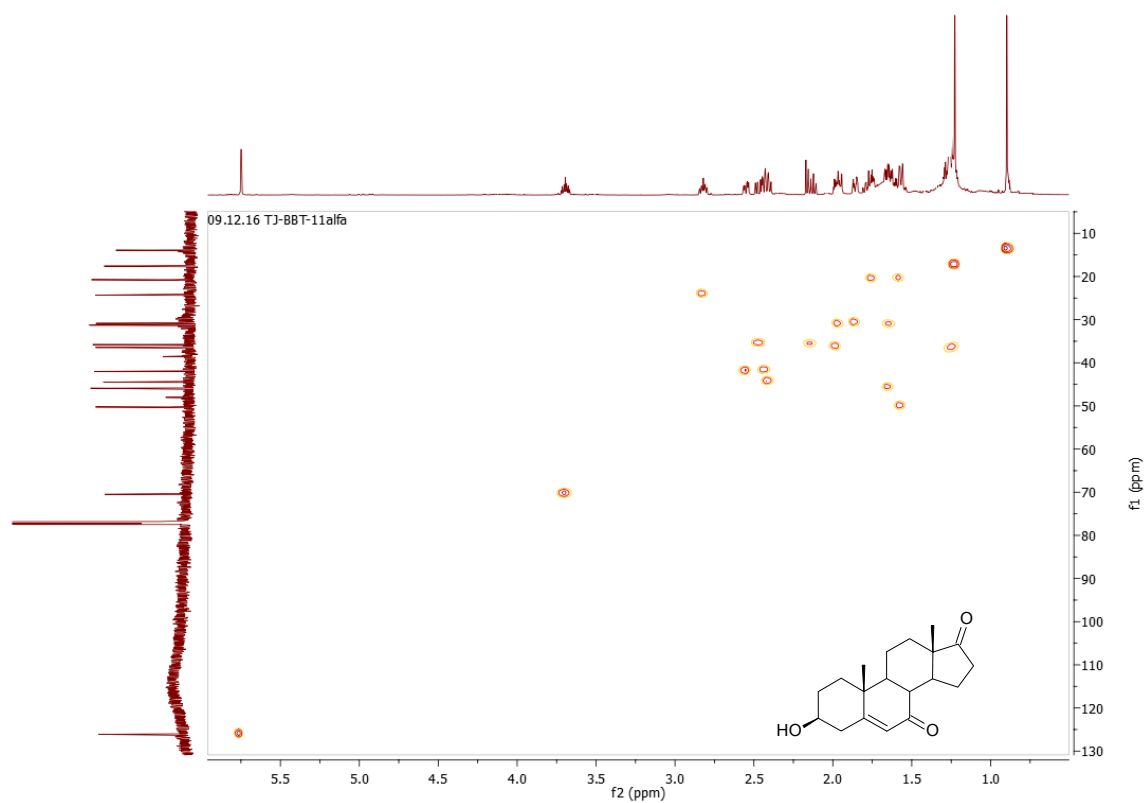

Fig.S32. COSY spectral of 3 $\beta$ -hydroxyandrost-5-ene-7,17-dione (**7-oxo-DHEA**)  
(CDCl<sub>3</sub>, 151 MHz)

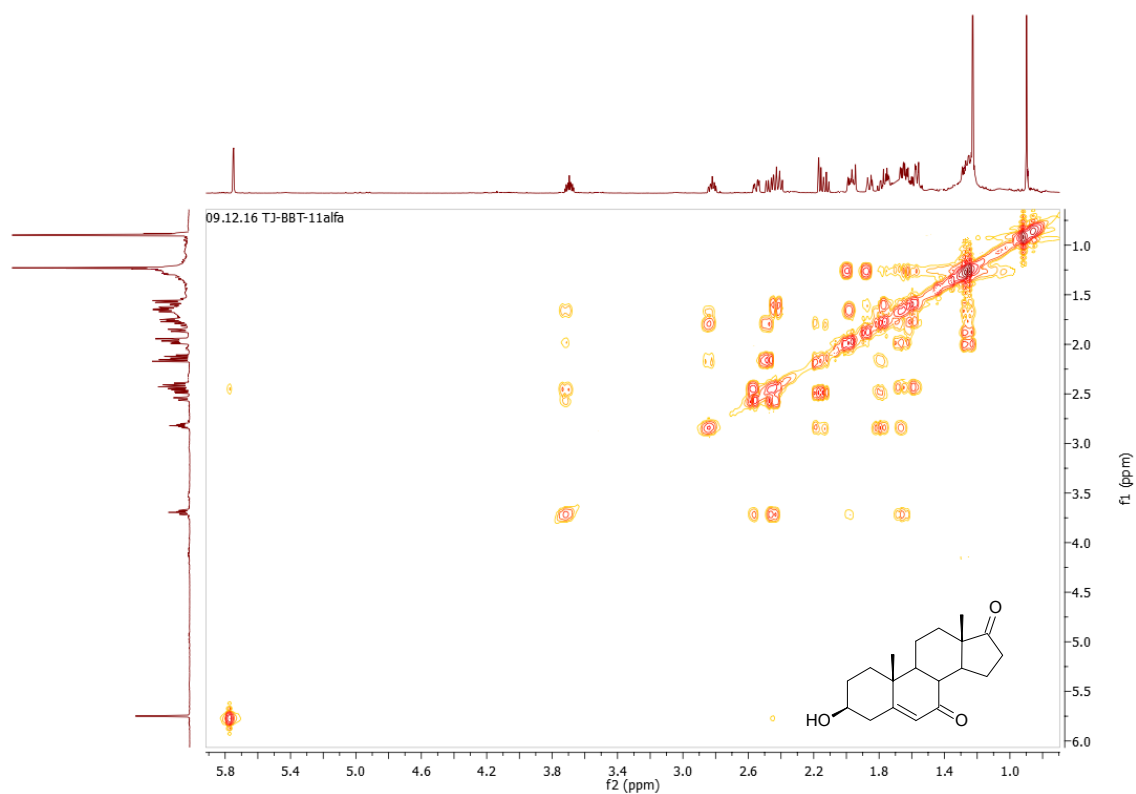

Fig.S33.  $^1\text{H}$  NMR spectral of  $3\beta,7\alpha$ -dihydroxy- $17\alpha$ -oxa-D-homo-androst-5-en-17-one ( **$7\alpha$ -OH-DHEA-lactone**) ( $\text{CDCl}_3$ , 600 MHz)

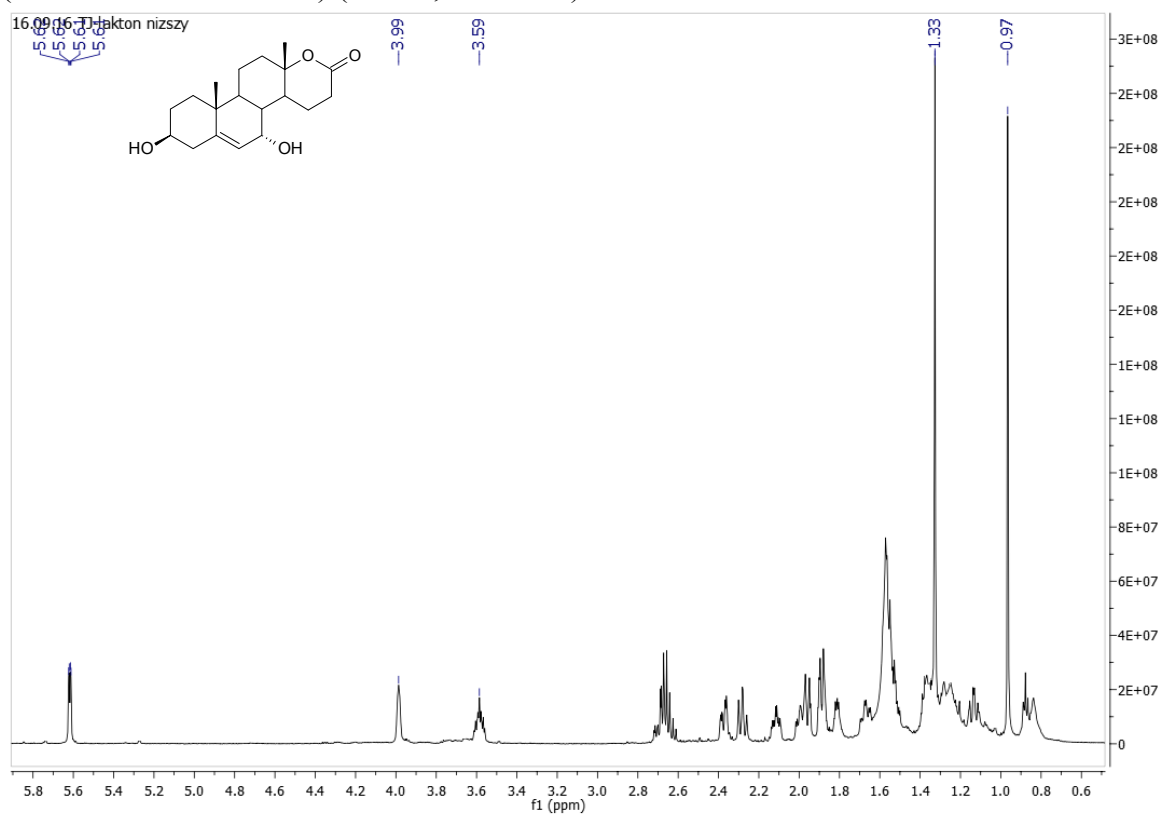

Fig.S34.  $^{13}\text{C}$  NMR spectral of  $3\beta,7\alpha$ -dihydroxy- $17\alpha$ -oxa-D-homo-androst-5-en-17-one ( **$7\alpha$ -OH-DHEA-lactone**) ( $\text{CDCl}_3$ , 151 MHz)

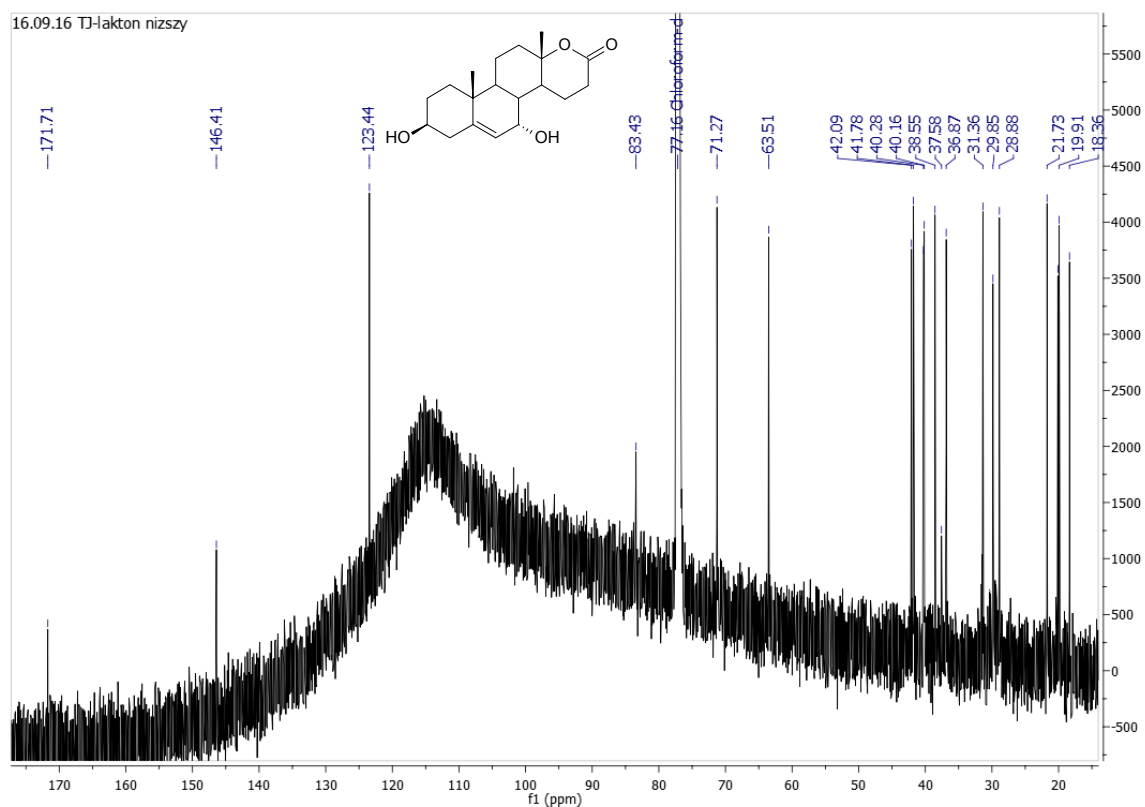

Fig.S35. HSQC spectral of  $3\beta,7\alpha$ -dihydroxy-17 $\alpha$ -oxa-D-homo-androst-5-en-17-one (**7 $\alpha$ -OH-DHEA-lactone**) ( $\text{CDCl}_3$ , 151 MHz)

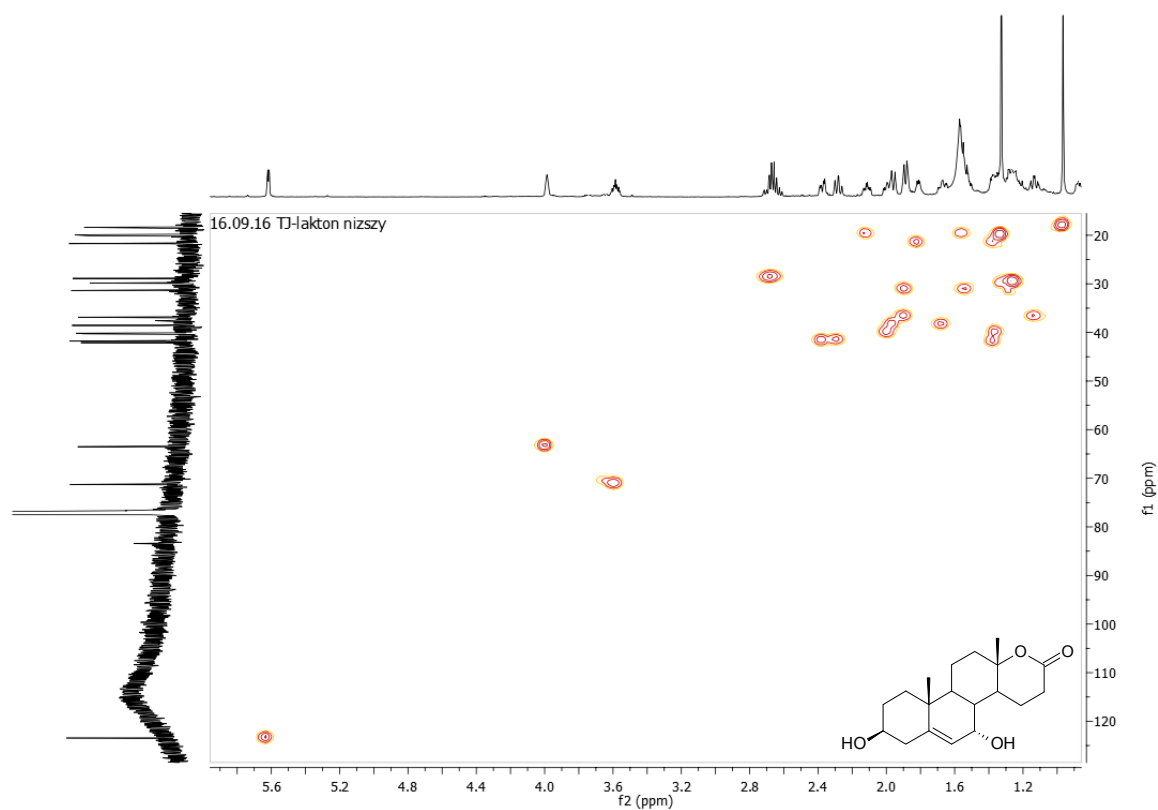

Fig.S36.  $^1\text{H}$  NMR spectral of  $3\beta,7\beta$ -dihydroxy-17 $\alpha$ -oxa-D-homo-androst-5-en-17-one (**7 $\beta$ OH-DHEA-lactone**) ( $\text{CDCl}_3$ , 600 MHz)

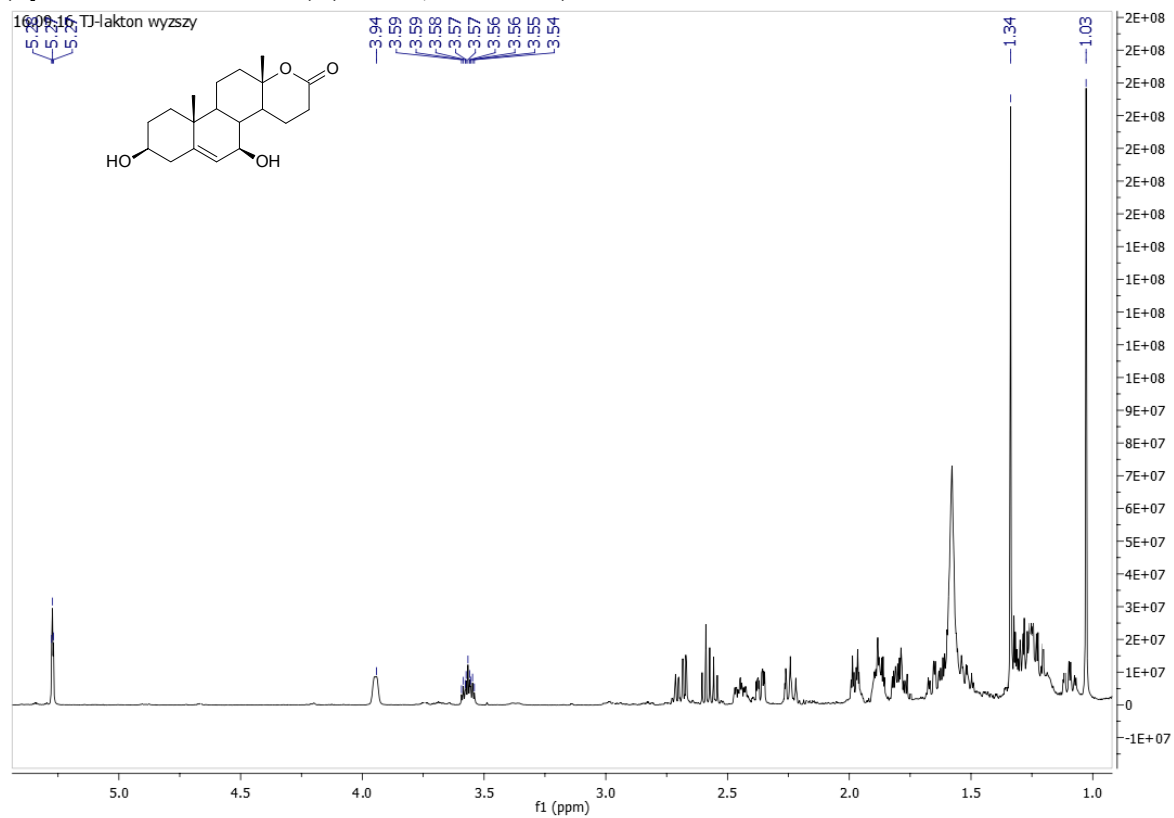

Fig.S37.  $^{13}\text{C}$  NMR spectral of  $3\beta,7\beta$ -dihydroxy- $17\alpha$ -oxa-D-homo-androst-5-en-17-one (**7 $\beta$ OH-DHEA-lactone**) ( $\text{CDCl}_3$ , 151 MHz)

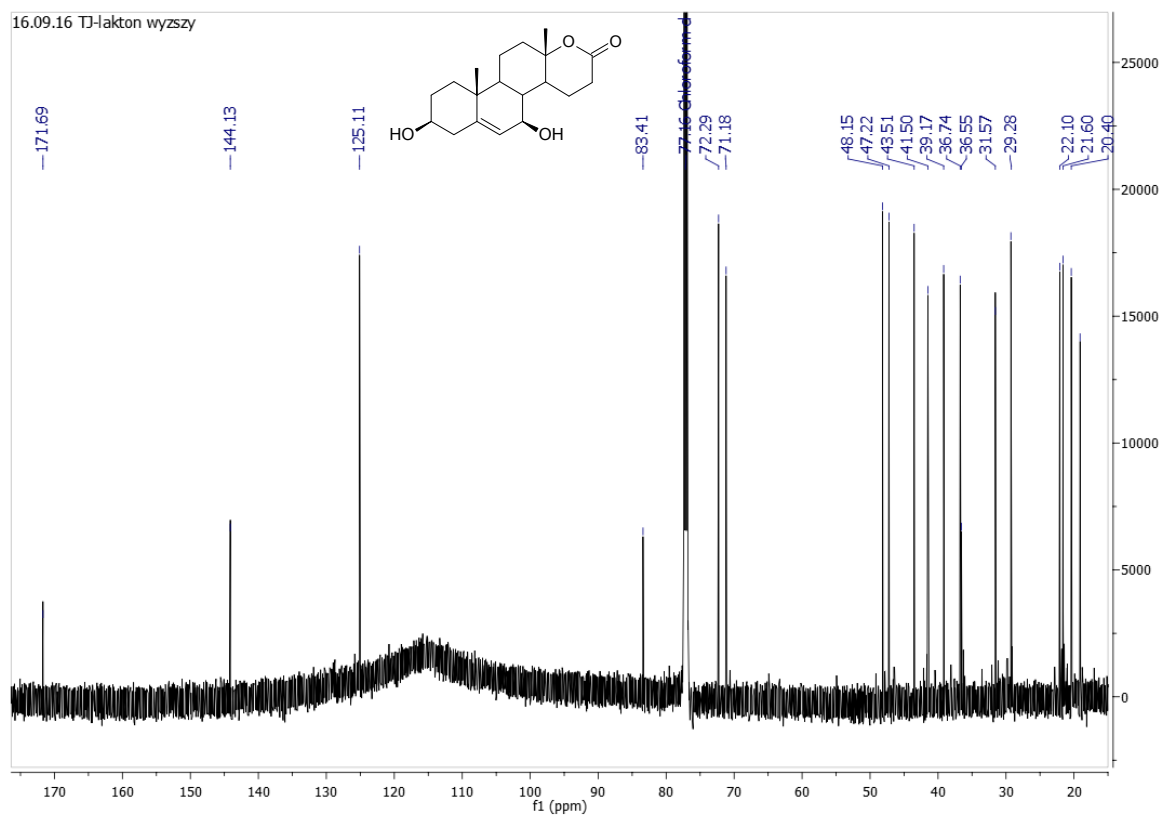

Fig.S38. HSQC spectral of  $3\beta,7\beta$ -dihydroxy- $17\alpha$ -oxa-D-homo-androst-5-en-17-one (**7 $\beta$ OH-DHEA-lactone**) ( $\text{CDCl}_3$ , 151 MHz)

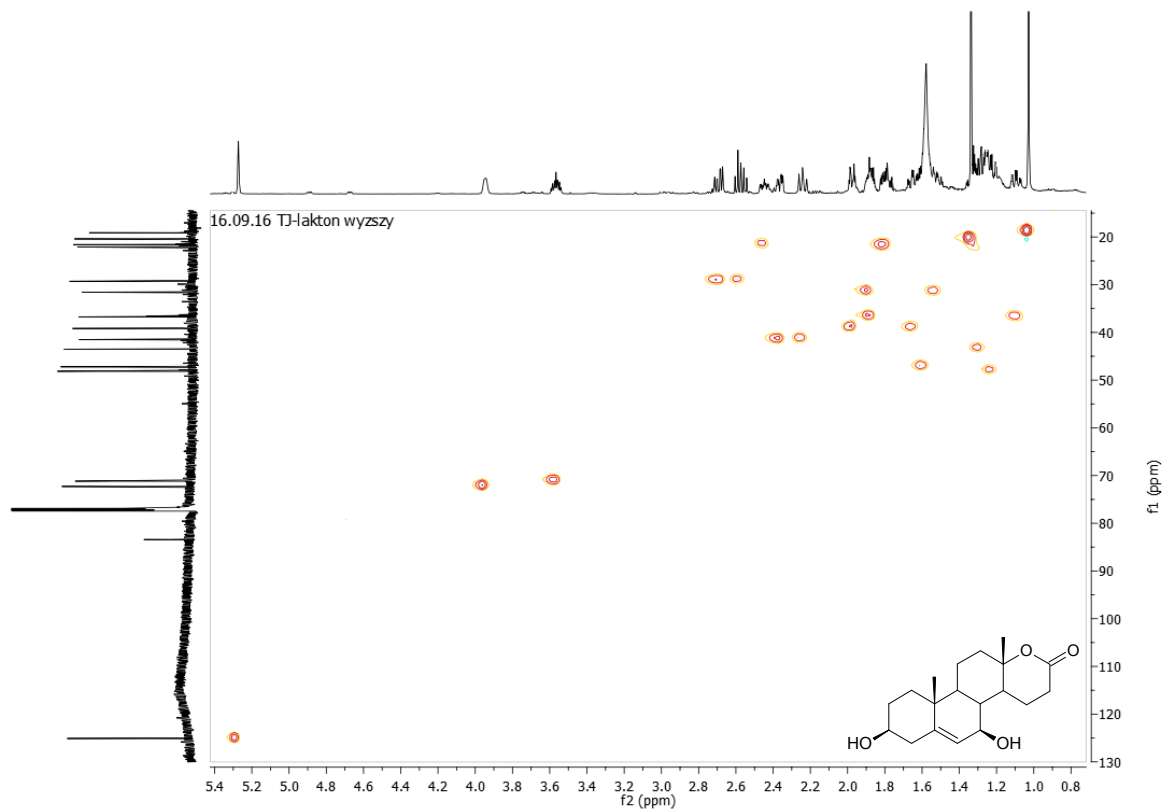

Fig.S39. GC-MS spectra of 7 $\alpha$ -hydroxyandrost-4-ene-3,17-dione (7 $\alpha$ -OH-AD)

Molecular Formula = C<sub>19</sub>H<sub>26</sub>O<sub>3</sub>  
Formula Weight = 302.40794

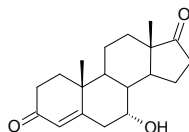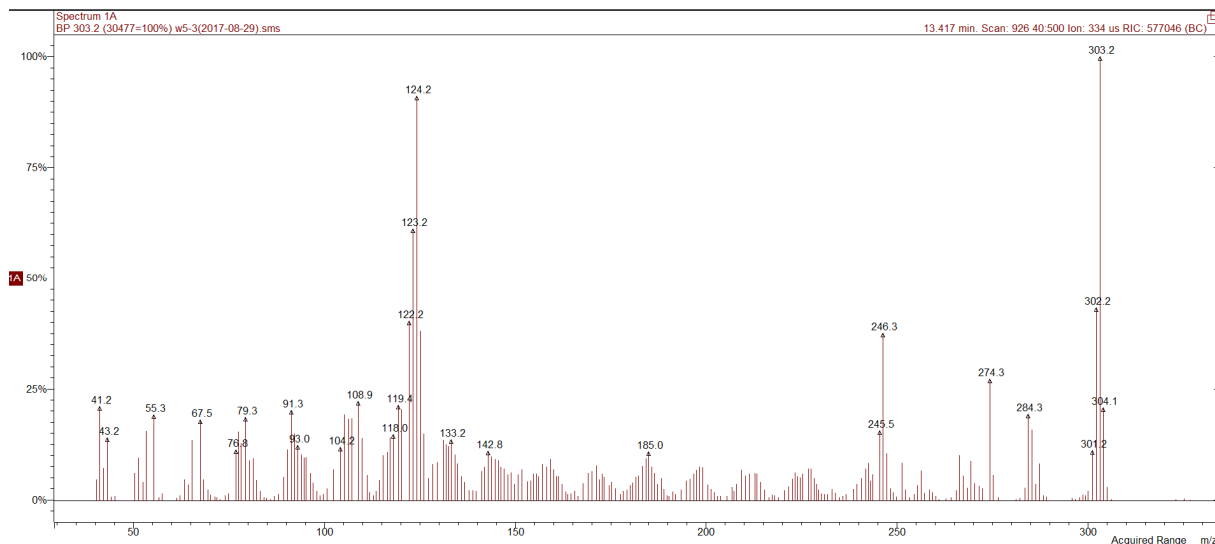

Fig.S40. Enlarged GC-MS spectra of 7 $\alpha$ -hydroxyandrost-4-ene-3,17-dione (7 $\alpha$ -OH-AD)

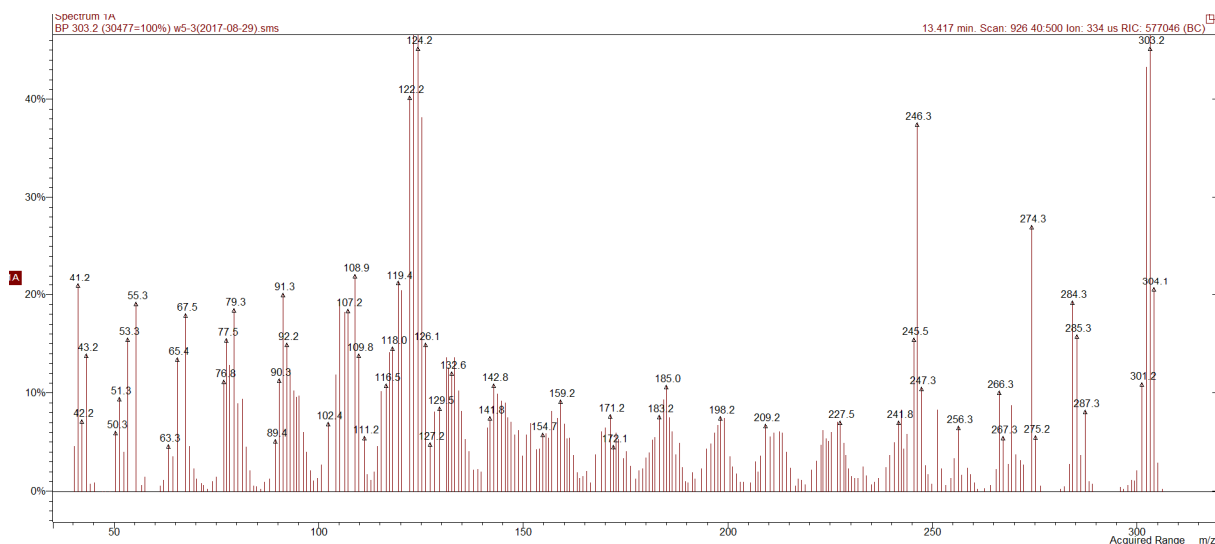

Fig.S41. GC-MS spectra of 6 $\beta$ -hydroxyandrost-4-ene-3,11,17-trione (**6 $\beta$ -OH-Adr**)

Molecular Formula C<sub>19</sub>H<sub>24</sub>O<sub>4</sub>  
Formula Weight = 316.39146

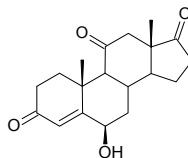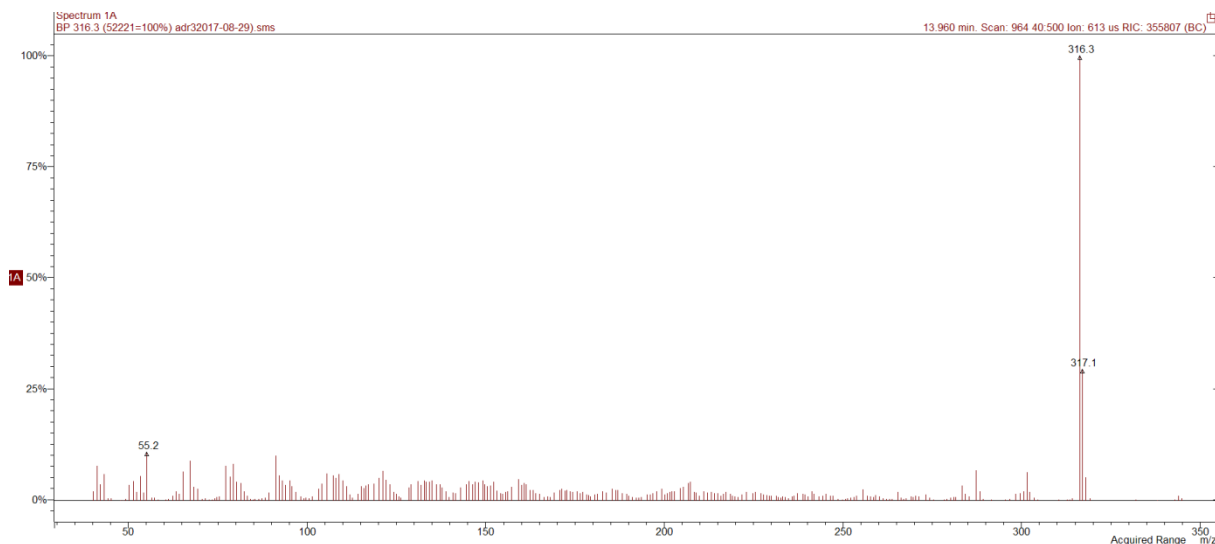

Fig.S42. Enlarged GC-MS spectra of 6 $\beta$ -hydroxyandrost-4-ene-3,11,17-trione (**6 $\beta$ -OH-Adr**)

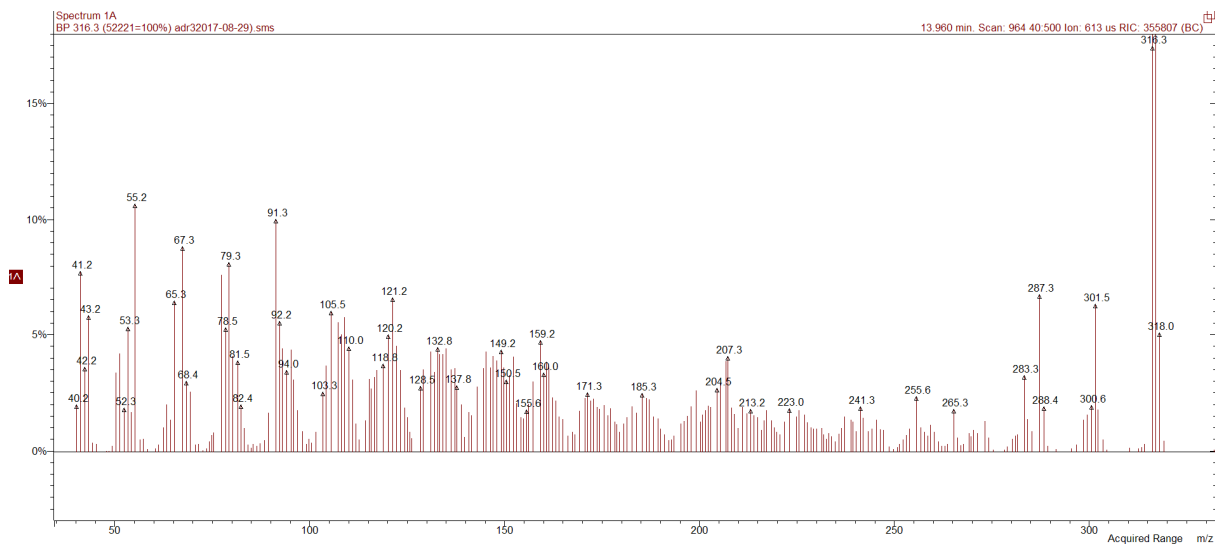



Fig.S43. GC-MS spectra of 15 $\beta$ -hydroxy-17 $\alpha$ -methyltestosterone (15 $\beta$ -OH-17mT)

Molecular Formula = C<sub>20</sub>H<sub>30</sub>O<sub>3</sub>  
Formula Weight = 318.45040

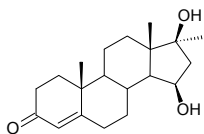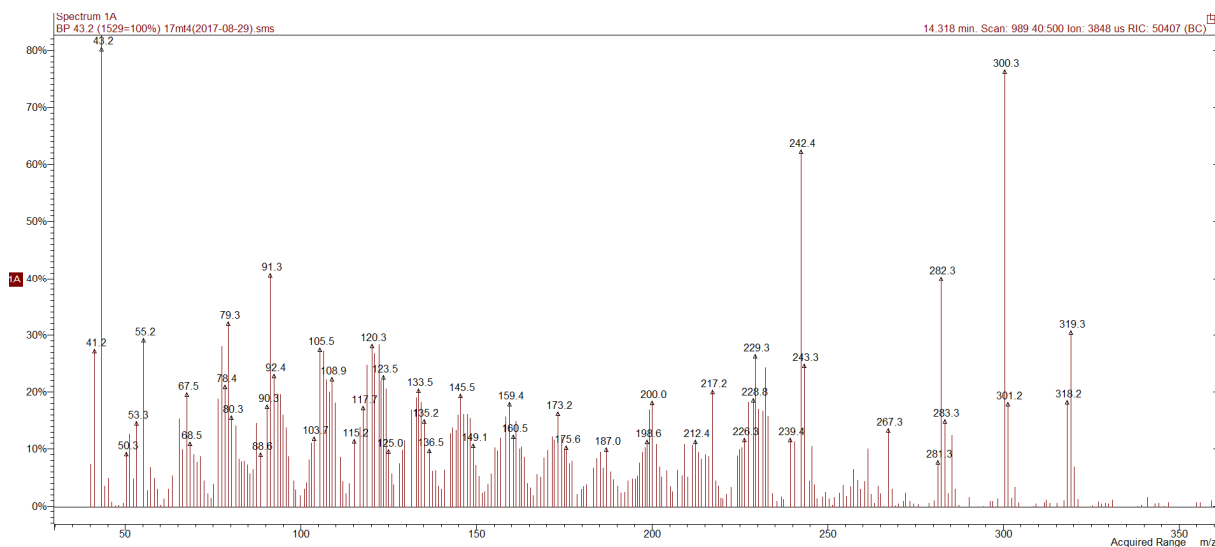

Fig.S44. GC-MS spectra of 6 $\beta$ -hydroxy-17 $\alpha$ -methyltestosterone (6 $\beta$ -OH-17mT)

Molecular Formula = C<sub>20</sub>H<sub>30</sub>O<sub>3</sub>  
Formula Weight = 318.45040

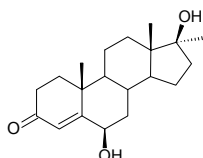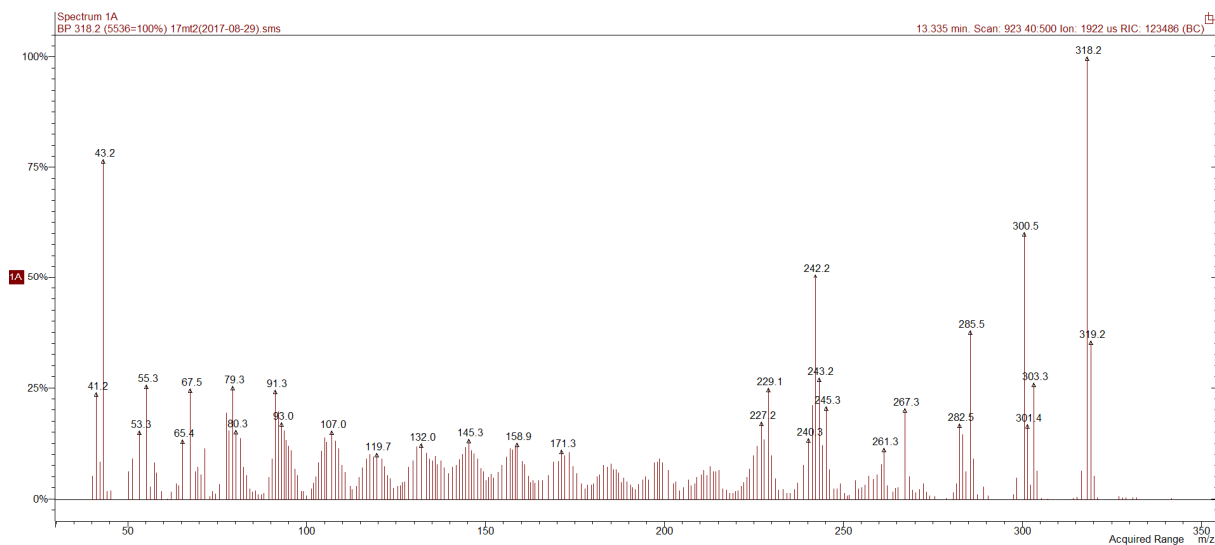

Fig.S45. GC-MS spectra of 6 $\beta$ ,12 $\beta$ -dihydroxy-17 $\alpha$ -methyltestosterone (6 $\beta$ ,12 $\beta$ -OH-17mT)

Molecular Formula = C<sub>20</sub>H<sub>30</sub>O<sub>4</sub>  
Formula Weight = 334.4980

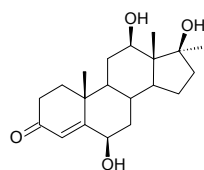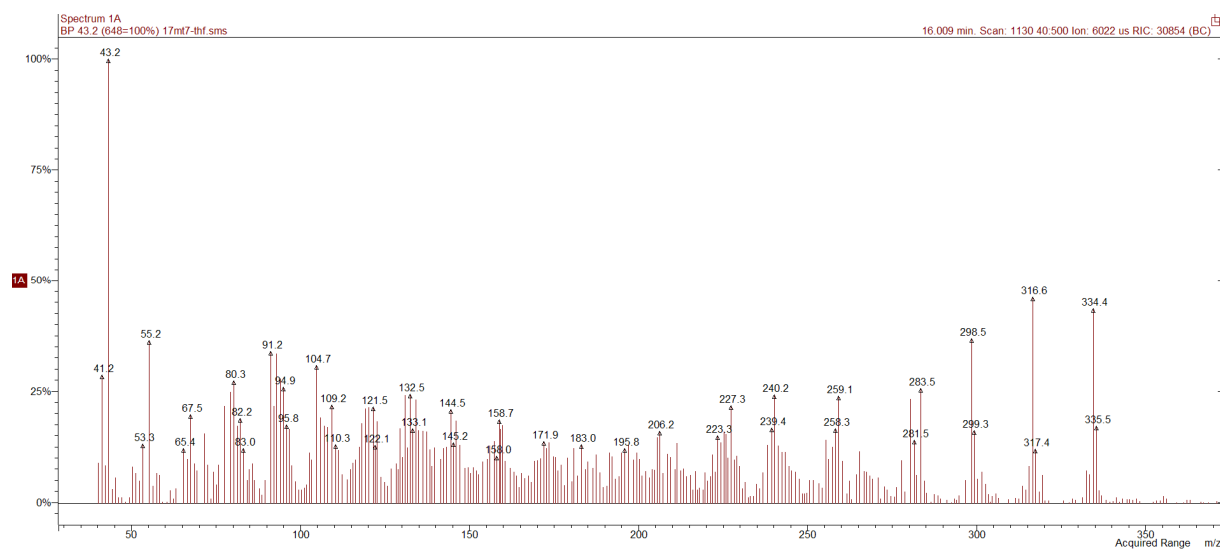

Fig.S46. Enlarged GC-MS spectra of 6 $\beta$ ,12 $\beta$ -dihydroxy-17 $\alpha$ -methyltestosterone (6 $\beta$ ,12 $\beta$ -OH-17mT)

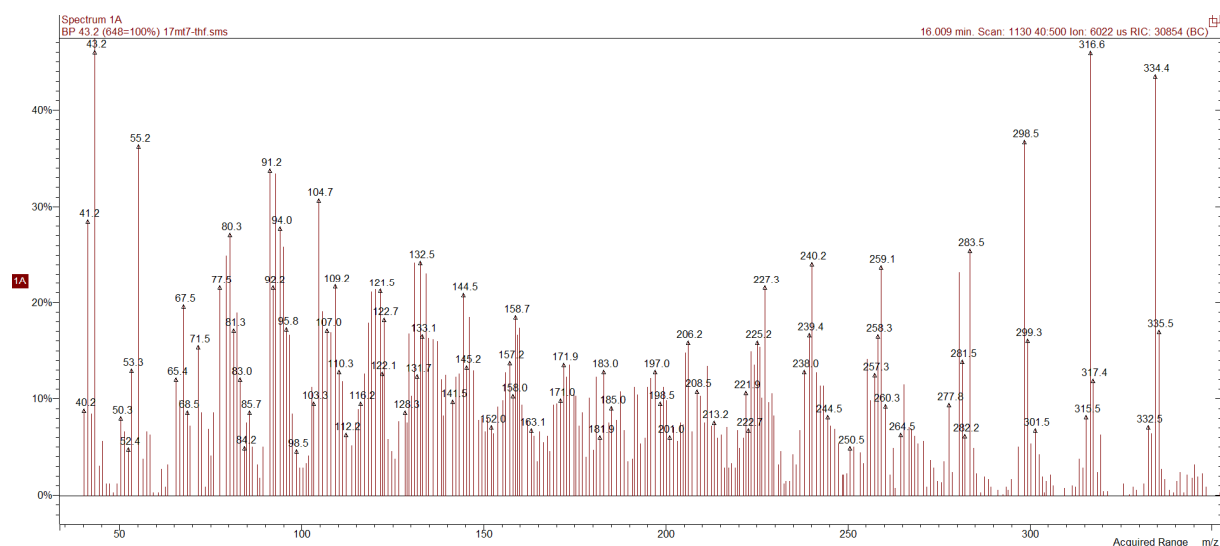

Fig.S47. GC-MS spectra of 3 $\beta$ ,7 $\alpha$ -dihydroxyandrost-5-ene-17-one (7 $\alpha$ -OH-DHEA)

Molecular Formula = C<sub>19</sub>H<sub>28</sub>O<sub>3</sub>  
Formula Weight = 304.42382

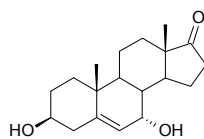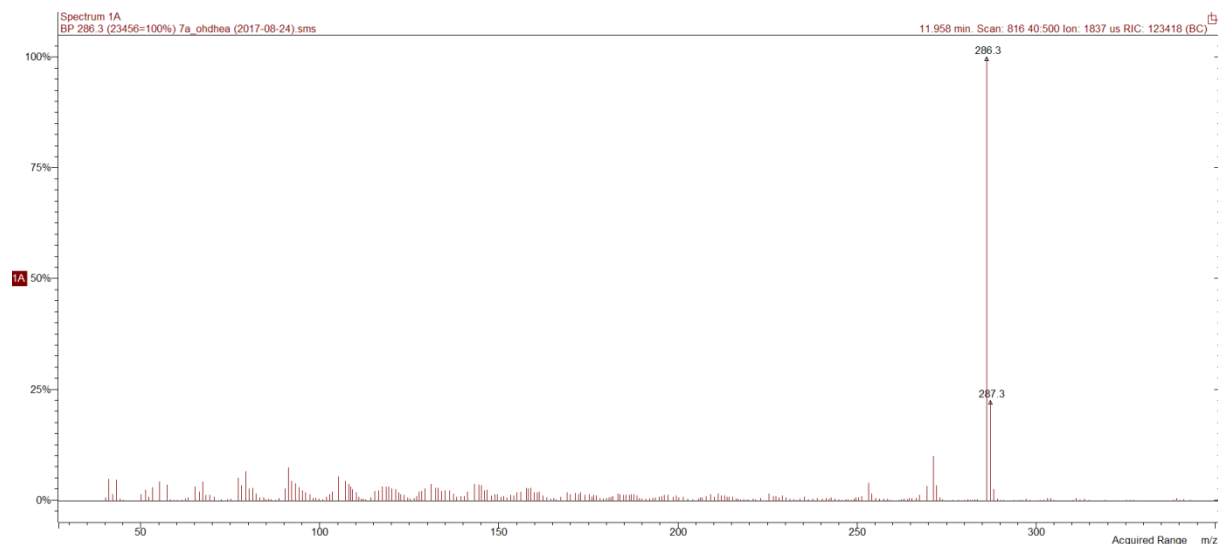

Fig.S48. Enlarged GC-MS spectra of 3 $\beta$ ,7 $\alpha$ -dihydroxyandrost-5-ene-17-one (7 $\alpha$ -OH-DHEA)

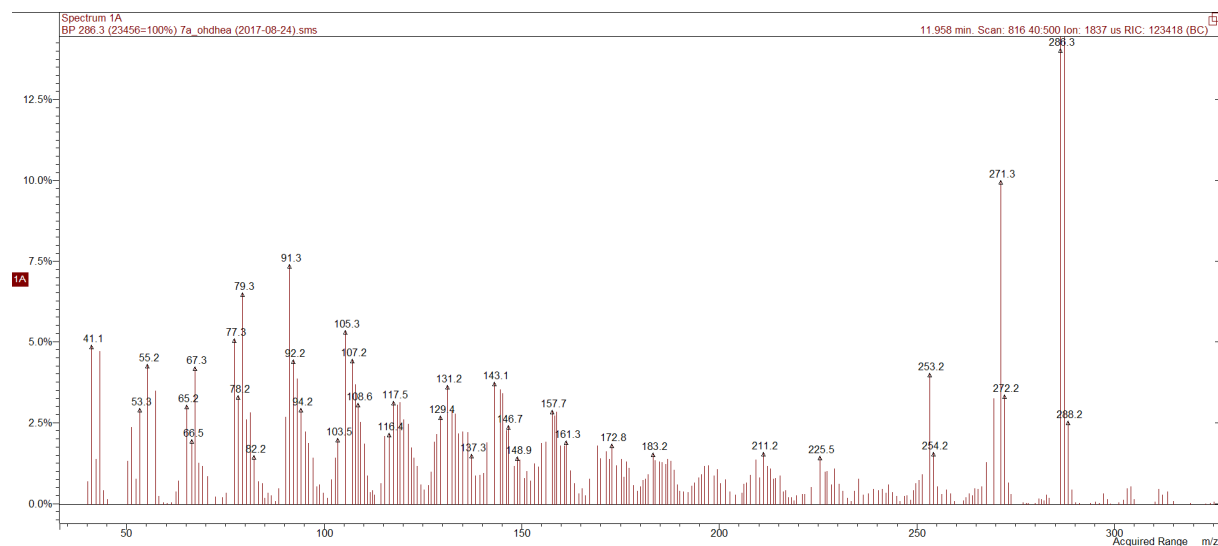

Fig.S49. GC-MS spectra of 3 $\beta$ ,7 $\beta$ -dihydroxyandrost-5-ene-17-one (7 $\beta$ -OH-DHEA)

Molecular Formula = C<sub>19</sub>H<sub>28</sub>O<sub>3</sub>  
Formula Weight = 304.42382

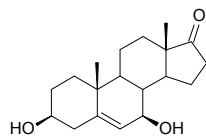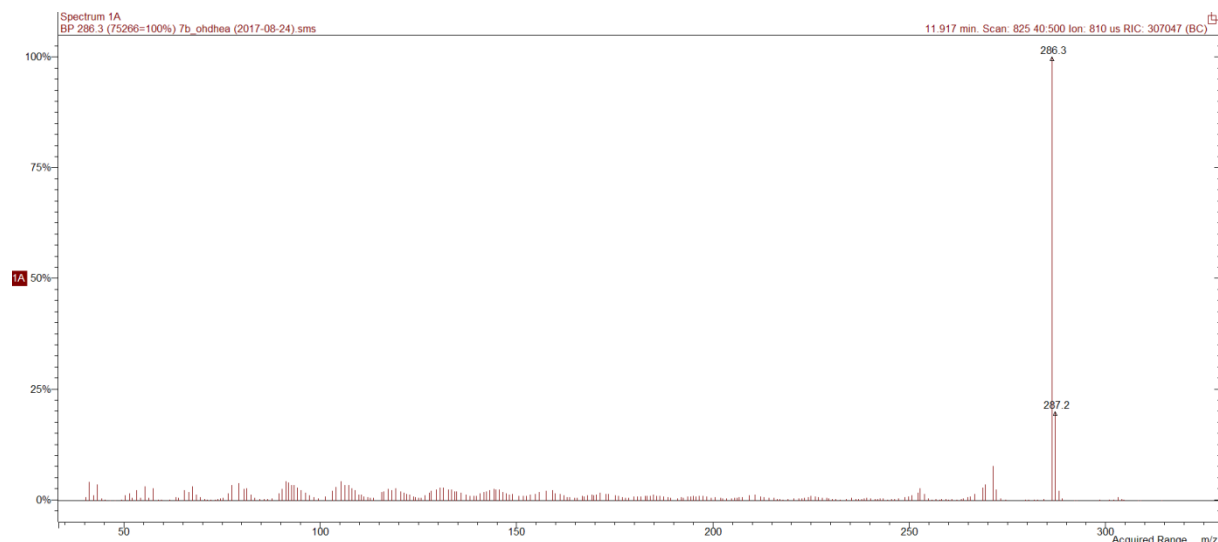

Fig.S50. Enlarged GC-MS spectra of 3 $\beta$ ,7 $\beta$ -dihydroxyandrost-5-ene-17-one (7 $\beta$ -OH-DHEA)

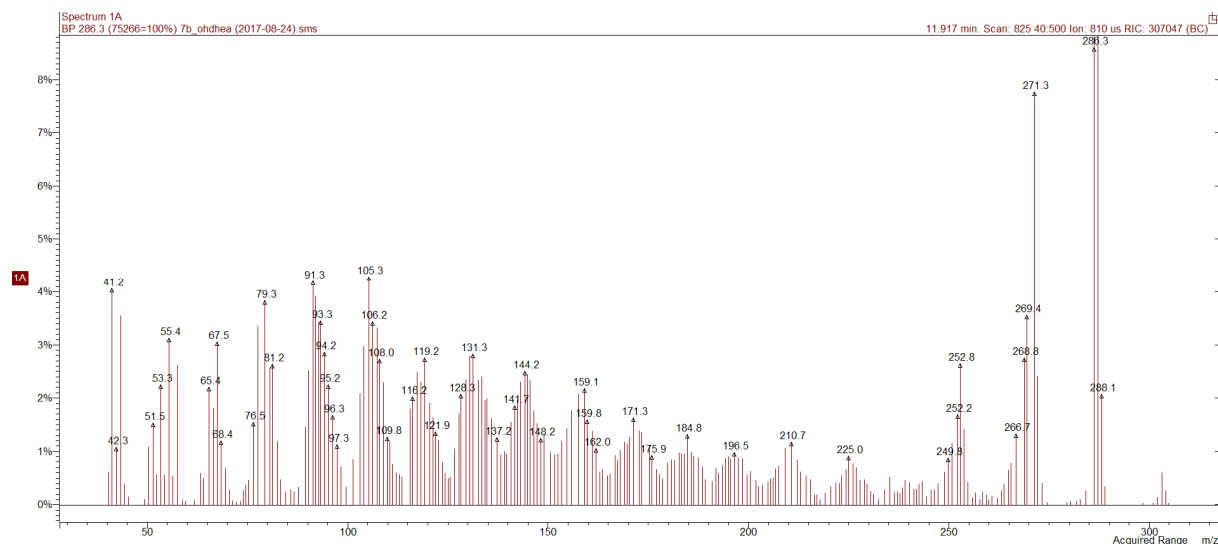

Fig.S51. GC-MS spectra of 3β-hydroxyandrost-5-ene-7,17-dione (**7-oxo-DHEA**)

Molecular Formula = C<sub>19</sub>H<sub>26</sub>O<sub>3</sub>  
Formula Weight = 302.40794

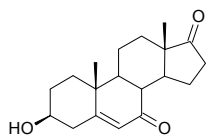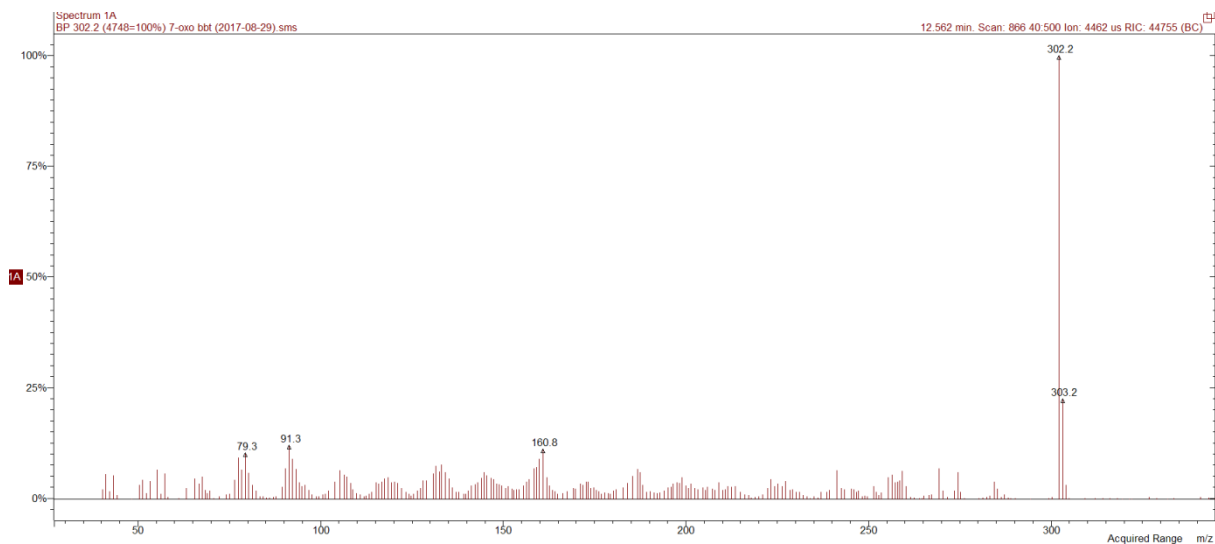

Fig.S52. Enlarged GC-MS spectra of 3β-hydroxyandrost-5-ene-7,17-dione (**7-oxo-DHEA**)

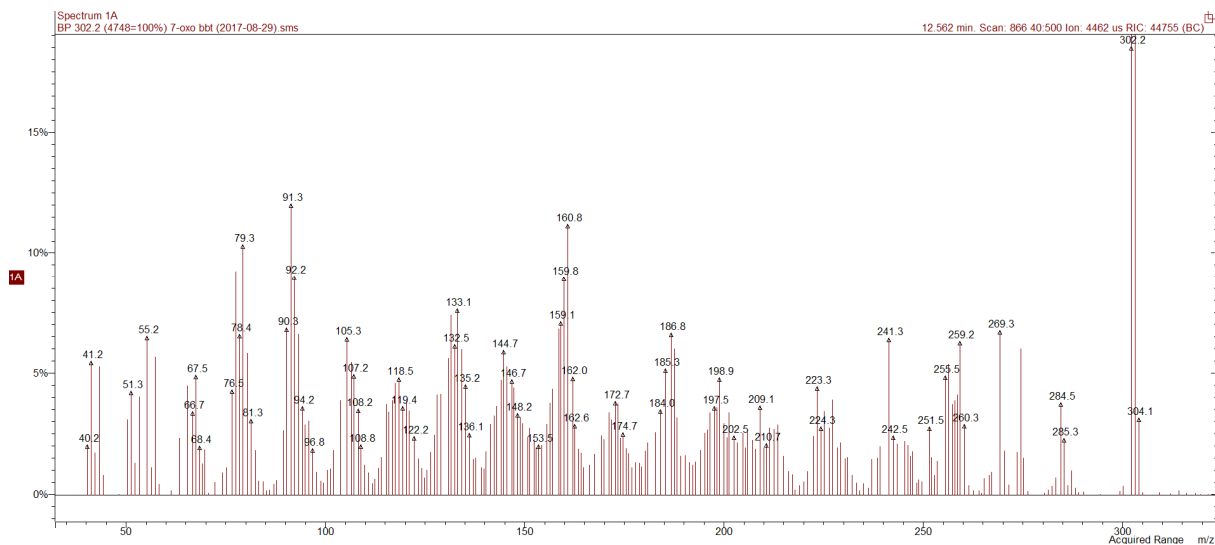

Fig.S53. GC-MS spectra of 3 $\beta$ ,7 $\alpha$ -dihydroxy-17 $\alpha$ -oxa-D-homo-androst-5-en-17-one (**7 $\alpha$ -OH-DHEA-lactone**)

Molecular Formula = C<sub>19</sub>H<sub>28</sub>O<sub>4</sub>  
Formula Weight = 320.42322

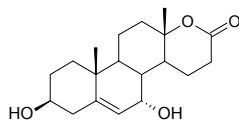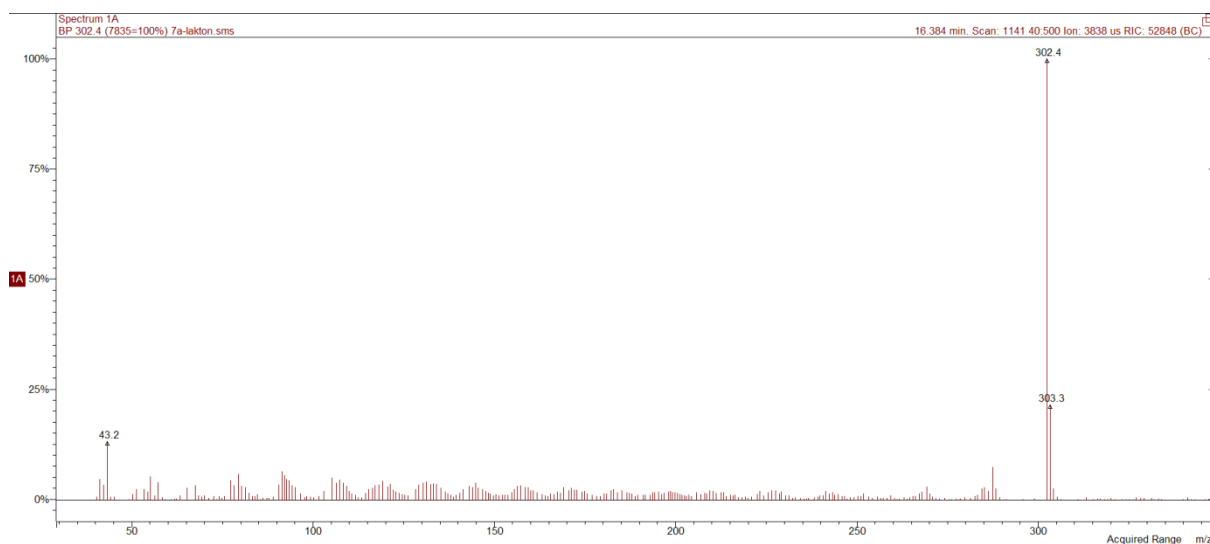

Fig.S54. Enlarged GC-MS spectra of 3 $\beta$ ,7 $\alpha$ -dihydroxy-17 $\alpha$ -oxa-D-homo-androst-5-en-17-one (**7 $\alpha$ -OH-DHEA-lactone**)

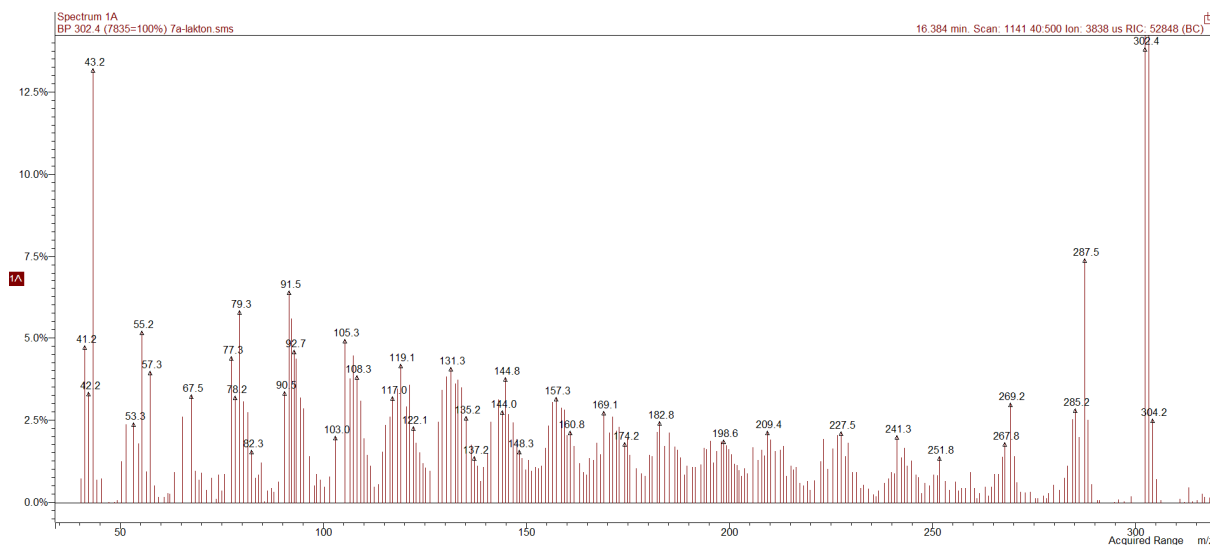

Fig.S55. GC-MS spectra of 3 $\beta$ ,7 $\beta$ -dihydroxy-17 $\alpha$ -oxa-D-homo-androst-5-en-17-one (**7 $\beta$ -OH-DHEA-lactone**)

Molecular Formula = C<sub>19</sub>H<sub>28</sub>O<sub>4</sub>  
Formula Weight = 320.42322

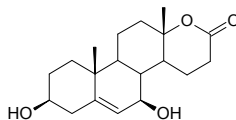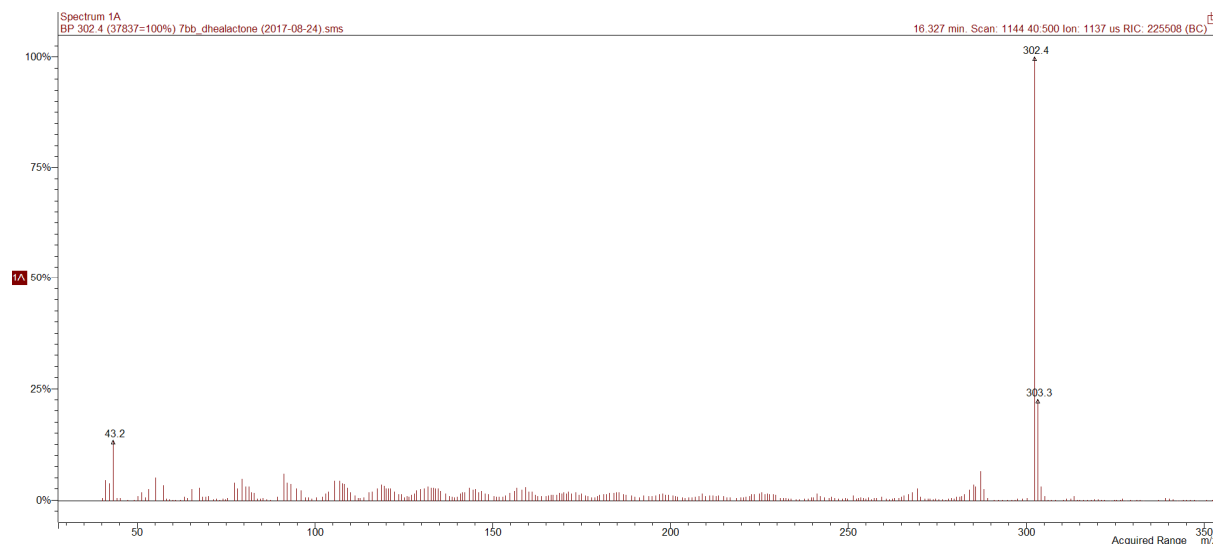

Fig.S56. Enlarged GC-MS spectra of 3 $\beta$ ,7 $\beta$ -dihydroxy-17 $\alpha$ -oxa-D-homo-androst-5-en-17-one (**7 $\beta$ -OH-DHEA-lactone**)

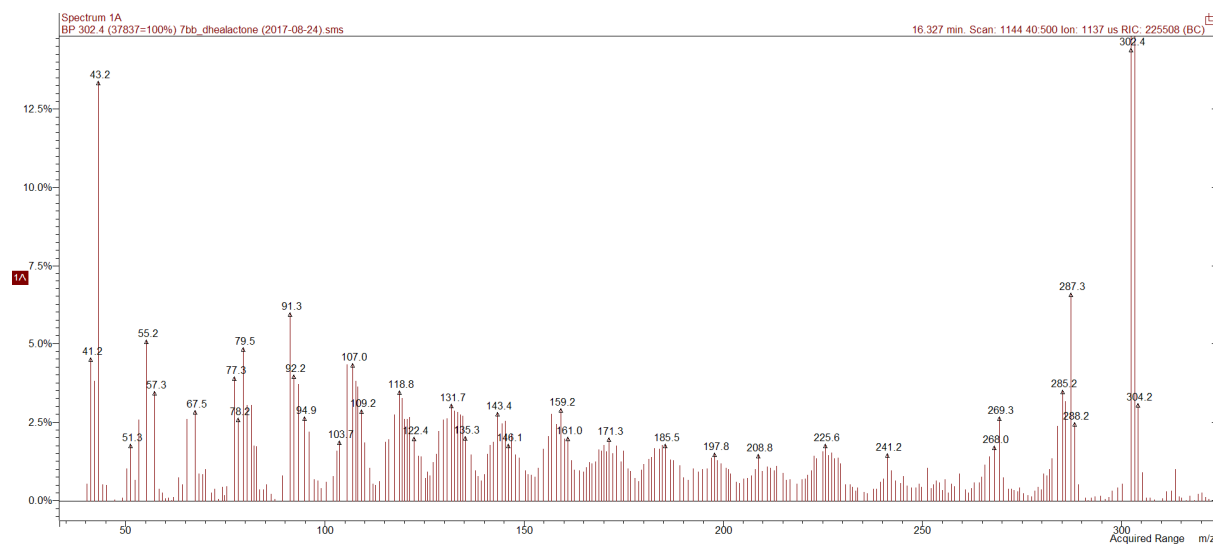

Supplement: molecules-22-01511-s001.pdf [file molecules-22-01511-s001.pdf]
